# Supplementary material
Source: publisher figshare collection journal article supplement (https://rs.figshare.com/ndownloader/files/35113061)
Supplement: Supplementary file 1 [file 35113061]

## Sheet: Sheet1
background	Distance	Primary	OCO	Comparison	Bird	pass
Grey	5-apart	3	8	3|8	Grn207	1
Grey	5-apart	3	8	3|8	Grn207	1
Grey	5-apart	3	8	3|8	Grn207	1
Grey	5-apart	3	8	3|8	Grn207	1
Grey	5-apart	3	8	3|8	Grn207	1
Grey	5-apart	3	8	3|8	Grn207	1
Grey	5-apart	3	8	3|8	Grn207	1
Grey	5-apart	3	8	3|8	Grn207	1
Grey	5-apart	3	8	3|8	Grn207	1
Grey	5-apart	3	8	3|8	Grn207	1
Grey	5-apart	3	8	3|8	Yel198	1
Grey	5-apart	3	8	3|8	Yel198	1
Grey	5-apart	3	8	3|8	Yel198	1
Grey	5-apart	3	8	3|8	Yel198	1
Grey	5-apart	3	8	3|8	Yel198	1
Grey	5-apart	3	8	3|8	Yel198	1
Grey	5-apart	3	8	3|8	Yel198	1
Grey	5-apart	3	8	3|8	Yel198	1
Grey	5-apart	3	8	3|8	Yel198	1
Grey	5-apart	3	8	3|8	Yel198	1
Grey	5-apart	3	8	3|8	Sil195	1
Grey	5-apart	3	8	3|8	Sil195	1
Grey	5-apart	3	8	3|8	Sil195	1
Grey	5-apart	3	8	3|8	Sil195	1
Grey	5-apart	3	8	3|8	Sil195	1
Grey	5-apart	3	8	3|8	Sil195	1
Grey	5-apart	3	8	3|8	Sil195	1
Grey	5-apart	3	8	3|8	Sil195	1
Grey	5-apart	3	8	3|8	Sil195	1
Grey	5-apart	3	8	3|8	Sil195	1
Grey	5-apart	3	8	3|8	Yel262	0
Grey	5-apart	3	8	3|8	Yel262	1
Grey	5-apart	3	8	3|8	Yel262	1
Grey	5-apart	3	8	3|8	Yel262	1
Grey	5-apart	3	8	3|8	Yel262	1
Grey	5-apart	3	8	3|8	Yel262	1
Grey	5-apart	3	8	3|8	Yel262	1
Grey	5-apart	3	8	3|8	Yel262	1
Grey	5-apart	3	8	3|8	Yel262	1
Grey	5-apart	3	8	3|8	Yel262	1
Grey	5-apart	3	8	3|8	Or189	1
Grey	5-apart	3	8	3|8	Or189	1
Grey	5-apart	3	8	3|8	Or189	1
Grey	5-apart	3	8	3|8	Or189	1
Grey	5-apart	3	8	3|8	Or189	1
Grey	5-apart	3	8	3|8	Or189	1
Grey	5-apart	3	8	3|8	Or189	1
Grey	5-apart	3	8	3|8	Or189	1
Grey	5-apart	3	8	3|8	Or189	1
Grey	5-apart	3	8	3|8	Or189	1
Grey	5-apart	3	8	3|8	Yel199	1
Grey	5-apart	3	8	3|8	Yel199	1
Grey	5-apart	3	8	3|8	Yel199	1
Grey	5-apart	3	8	3|8	Yel199	1
Grey	5-apart	3	8	3|8	Yel199	1
Grey	5-apart	3	8	3|8	Yel199	1
Grey	5-apart	3	8	3|8	Yel199	1
Grey	5-apart	3	8	3|8	Yel199	1
Grey	5-apart	3	8	3|8	Yel199	1
Grey	5-apart	3	8	3|8	Yel199	1
Grey	4-apart	3	7	3|7	Grn207	1
Grey	4-apart	3	7	3|7	Grn207	1
Grey	4-apart	3	7	3|7	Grn207	1
Grey	4-apart	3	7	3|7	Grn207	1
Grey	4-apart	3	7	3|7	Grn207	1
Grey	4-apart	3	7	3|7	Grn207	1
Grey	4-apart	3	7	3|7	Grn207	1
Grey	4-apart	3	7	3|7	Grn207	1
Grey	4-apart	3	7	3|7	Grn207	1
Grey	4-apart	3	7	3|7	Grn207	1
Grey	4-apart	3	7	3|7	Yel198	0
Grey	4-apart	3	7	3|7	Yel198	1
Grey	4-apart	3	7	3|7	Yel198	1
Grey	4-apart	3	7	3|7	Yel198	1
Grey	4-apart	3	7	3|7	Yel198	1
Grey	4-apart	3	7	3|7	Yel198	1
Grey	4-apart	3	7	3|7	Yel198	1
Grey	4-apart	3	7	3|7	Yel198	1
Grey	4-apart	3	7	3|7	Yel198	1
Grey	4-apart	3	7	3|7	Yel198	1
Grey	4-apart	3	7	3|7	Sil195	1
Grey	4-apart	3	7	3|7	Sil195	1
Grey	4-apart	3	7	3|7	Sil195	1
Grey	4-apart	3	7	3|7	Sil195	1
Grey	4-apart	3	7	3|7	Sil195	1
Grey	4-apart	3	7	3|7	Sil195	1
Grey	4-apart	3	7	3|7	Sil195	1
Grey	4-apart	3	7	3|7	Sil195	1
Grey	4-apart	3	7	3|7	Sil195	1
Grey	4-apart	3	7	3|7	Sil195	1
Grey	4-apart	3	7	3|7	Yel262	1
Grey	4-apart	3	7	3|7	Yel262	1
Grey	4-apart	3	7	3|7	Yel262	1
Grey	4-apart	3	7	3|7	Yel262	1
Grey	4-apart	3	7	3|7	Yel262	1
Grey	4-apart	3	7	3|7	Yel262	1
Grey	4-apart	3	7	3|7	Yel262	1
Grey	4-apart	3	7	3|7	Yel262	1
Grey	4-apart	3	7	3|7	Yel262	1
Grey	4-apart	3	7	3|7	Yel262	1
Grey	4-apart	3	7	3|7	Or189	1
Grey	4-apart	3	7	3|7	Or189	1
Grey	4-apart	3	7	3|7	Or189	1
Grey	4-apart	3	7	3|7	Or189	1
Grey	4-apart	3	7	3|7	Or189	1
Grey	4-apart	3	7	3|7	Or189	1
Grey	4-apart	3	7	3|7	Or189	1
Grey	4-apart	3	7	3|7	Or189	1
Grey	4-apart	3	7	3|7	Or189	1
Grey	4-apart	3	7	3|7	Or189	1
Grey	4-apart	3	7	3|7	Yel199	0
Grey	4-apart	3	7	3|7	Yel199	1
Grey	4-apart	3	7	3|7	Yel199	1
Grey	4-apart	3	7	3|7	Yel199	1
Grey	4-apart	3	7	3|7	Yel199	1
Grey	4-apart	3	7	3|7	Yel199	1
Grey	4-apart	3	7	3|7	Yel199	1
Grey	4-apart	3	7	3|7	Yel199	1
Grey	4-apart	3	7	3|7	Yel199	1
Grey	4-apart	3	7	3|7	Yel199	1
Grey	4-apart	4	8	4|8	Grn207	1
Grey	4-apart	4	8	4|8	Grn207	1
Grey	4-apart	4	8	4|8	Grn207	1
Grey	4-apart	4	8	4|8	Grn207	1
Grey	4-apart	4	8	4|8	Grn207	1
Grey	4-apart	4	8	4|8	Grn207	1
Grey	4-apart	4	8	4|8	Grn207	1
Grey	4-apart	4	8	4|8	Grn207	1
Grey	4-apart	4	8	4|8	Grn207	1
Grey	4-apart	4	8	4|8	Grn207	1
Grey	4-apart	4	8	4|8	Yel198	0
Grey	4-apart	4	8	4|8	Yel198	0
Grey	4-apart	4	8	4|8	Yel198	1
Grey	4-apart	4	8	4|8	Yel198	1
Grey	4-apart	4	8	4|8	Yel198	1
Grey	4-apart	4	8	4|8	Yel198	1
Grey	4-apart	4	8	4|8	Yel198	1
Grey	4-apart	4	8	4|8	Yel198	1
Grey	4-apart	4	8	4|8	Yel198	1
Grey	4-apart	4	8	4|8	Yel198	1
Grey	4-apart	4	8	4|8	Sil195	1
Grey	4-apart	4	8	4|8	Sil195	1
Grey	4-apart	4	8	4|8	Sil195	1
Grey	4-apart	4	8	4|8	Sil195	1
Grey	4-apart	4	8	4|8	Sil195	1
Grey	4-apart	4	8	4|8	Sil195	1
Grey	4-apart	4	8	4|8	Sil195	1
Grey	4-apart	4	8	4|8	Sil195	1
Grey	4-apart	4	8	4|8	Sil195	1
Grey	4-apart	4	8	4|8	Sil195	1
Grey	4-apart	4	8	4|8	Yel262	1
Grey	4-apart	4	8	4|8	Yel262	1
Grey	4-apart	4	8	4|8	Yel262	1
Grey	4-apart	4	8	4|8	Yel262	1
Grey	4-apart	4	8	4|8	Yel262	1
Grey	4-apart	4	8	4|8	Yel262	1
Grey	4-apart	4	8	4|8	Yel262	1
Grey	4-apart	4	8	4|8	Yel262	1
Grey	4-apart	4	8	4|8	Yel262	1
Grey	4-apart	4	8	4|8	Yel262	1
Grey	4-apart	4	8	4|8	Or189	0
Grey	4-apart	4	8	4|8	Or189	1
Grey	4-apart	4	8	4|8	Or189	1
Grey	4-apart	4	8	4|8	Or189	1
Grey	4-apart	4	8	4|8	Or189	1
Grey	4-apart	4	8	4|8	Or189	1
Grey	4-apart	4	8	4|8	Or189	1
Grey	4-apart	4	8	4|8	Or189	1
Grey	4-apart	4	8	4|8	Or189	1
Grey	4-apart	4	8	4|8	Or189	1
Grey	4-apart	4	8	4|8	Yel199	1
Grey	4-apart	4	8	4|8	Yel199	1
Grey	4-apart	4	8	4|8	Yel199	1
Grey	4-apart	4	8	4|8	Yel199	1
Grey	4-apart	4	8	4|8	Yel199	1
Grey	4-apart	4	8	4|8	Yel199	1
Grey	4-apart	4	8	4|8	Yel199	1
Grey	4-apart	4	8	4|8	Yel199	1
Grey	4-apart	4	8	4|8	Yel199	1
Grey	4-apart	4	8	4|8	Yel199	1
Grey	3-apart	3	6	3|6	Grn207	1
Grey	3-apart	3	6	3|6	Grn207	1
Grey	3-apart	3	6	3|6	Grn207	1
Grey	3-apart	3	6	3|6	Grn207	1
Grey	3-apart	3	6	3|6	Grn207	1
Grey	3-apart	3	6	3|6	Grn207	1
Grey	3-apart	3	6	3|6	Grn207	1
Grey	3-apart	3	6	3|6	Grn207	1
Grey	3-apart	3	6	3|6	Grn207	1
Grey	3-apart	3	6	3|6	Grn207	1
Grey	3-apart	3	6	3|6	Yel198	0
Grey	3-apart	3	6	3|6	Yel198	0
Grey	3-apart	3	6	3|6	Yel198	0
Grey	3-apart	3	6	3|6	Yel198	1
Grey	3-apart	3	6	3|6	Yel198	1
Grey	3-apart	3	6	3|6	Yel198	1
Grey	3-apart	3	6	3|6	Yel198	1
Grey	3-apart	3	6	3|6	Yel198	1
Grey	3-apart	3	6	3|6	Yel198	1
Grey	3-apart	3	6	3|6	Yel198	1
Grey	3-apart	3	6	3|6	Sil195	1
Grey	3-apart	3	6	3|6	Sil195	1
Grey	3-apart	3	6	3|6	Sil195	1
Grey	3-apart	3	6	3|6	Sil195	1
Grey	3-apart	3	6	3|6	Sil195	1
Grey	3-apart	3	6	3|6	Sil195	1
Grey	3-apart	3	6	3|6	Sil195	1
Grey	3-apart	3	6	3|6	Sil195	1
Grey	3-apart	3	6	3|6	Sil195	1
Grey	3-apart	3	6	3|6	Sil195	1
Grey	3-apart	3	6	3|6	Yel262	1
Grey	3-apart	3	6	3|6	Yel262	1
Grey	3-apart	3	6	3|6	Yel262	1
Grey	3-apart	3	6	3|6	Yel262	1
Grey	3-apart	3	6	3|6	Yel262	1
Grey	3-apart	3	6	3|6	Yel262	1
Grey	3-apart	3	6	3|6	Yel262	1
Grey	3-apart	3	6	3|6	Yel262	1
Grey	3-apart	3	6	3|6	Yel262	1
Grey	3-apart	3	6	3|6	Yel262	1
Grey	3-apart	3	6	3|6	Or189	0
Grey	3-apart	3	6	3|6	Or189	0
Grey	3-apart	3	6	3|6	Or189	1
Grey	3-apart	3	6	3|6	Or189	1
Grey	3-apart	3	6	3|6	Or189	1
Grey	3-apart	3	6	3|6	Or189	1
Grey	3-apart	3	6	3|6	Or189	1
Grey	3-apart	3	6	3|6	Or189	1
Grey	3-apart	3	6	3|6	Or189	1
Grey	3-apart	3	6	3|6	Or189	1
Grey	3-apart	3	6	3|6	Yel199	0
Grey	3-apart	3	6	3|6	Yel199	0
Grey	3-apart	3	6	3|6	Yel199	1
Grey	3-apart	3	6	3|6	Yel199	1
Grey	3-apart	3	6	3|6	Yel199	1
Grey	3-apart	3	6	3|6	Yel199	1
Grey	3-apart	3	6	3|6	Yel199	1
Grey	3-apart	3	6	3|6	Yel199	1
Grey	3-apart	3	6	3|6	Yel199	1
Grey	3-apart	3	6	3|6	Yel199	1
Grey	3-apart	4	7	4|7	Grn207	0
Grey	3-apart	4	7	4|7	Grn207	1
Grey	3-apart	4	7	4|7	Grn207	1
Grey	3-apart	4	7	4|7	Grn207	1
Grey	3-apart	4	7	4|7	Grn207	1
Grey	3-apart	4	7	4|7	Grn207	1
Grey	3-apart	4	7	4|7	Grn207	1
Grey	3-apart	4	7	4|7	Grn207	1
Grey	3-apart	4	7	4|7	Grn207	1
Grey	3-apart	4	7	4|7	Grn207	1
Grey	3-apart	4	7	4|7	Yel198	0
Grey	3-apart	4	7	4|7	Yel198	0
Grey	3-apart	4	7	4|7	Yel198	0
Grey	3-apart	4	7	4|7	Yel198	1
Grey	3-apart	4	7	4|7	Yel198	1
Grey	3-apart	4	7	4|7	Yel198	1
Grey	3-apart	4	7	4|7	Yel198	1
Grey	3-apart	4	7	4|7	Yel198	1
Grey	3-apart	4	7	4|7	Yel198	1
Grey	3-apart	4	7	4|7	Yel198	1
Grey	3-apart	4	7	4|7	Sil195	1
Grey	3-apart	4	7	4|7	Sil195	1
Grey	3-apart	4	7	4|7	Sil195	1
Grey	3-apart	4	7	4|7	Sil195	1
Grey	3-apart	4	7	4|7	Sil195	1
Grey	3-apart	4	7	4|7	Sil195	1
Grey	3-apart	4	7	4|7	Sil195	1
Grey	3-apart	4	7	4|7	Sil195	1
Grey	3-apart	4	7	4|7	Sil195	1
Grey	3-apart	4	7	4|7	Sil195	1
Grey	3-apart	4	7	4|7	Yel262	0
Grey	3-apart	4	7	4|7	Yel262	0
Grey	3-apart	4	7	4|7	Yel262	0
Grey	3-apart	4	7	4|7	Yel262	1
Grey	3-apart	4	7	4|7	Yel262	1
Grey	3-apart	4	7	4|7	Yel262	1
Grey	3-apart	4	7	4|7	Yel262	1
Grey	3-apart	4	7	4|7	Yel262	1
Grey	3-apart	4	7	4|7	Yel262	1
Grey	3-apart	4	7	4|7	Yel262	1
Grey	3-apart	4	7	4|7	Or189	1
Grey	3-apart	4	7	4|7	Or189	1
Grey	3-apart	4	7	4|7	Or189	1
Grey	3-apart	4	7	4|7	Or189	1
Grey	3-apart	4	7	4|7	Or189	1
Grey	3-apart	4	7	4|7	Or189	1
Grey	3-apart	4	7	4|7	Or189	1
Grey	3-apart	4	7	4|7	Or189	1
Grey	3-apart	4	7	4|7	Or189	1
Grey	3-apart	4	7	4|7	Or189	1
Grey	3-apart	4	7	4|7	Yel199	1
Grey	3-apart	4	7	4|7	Yel199	1
Grey	3-apart	4	7	4|7	Yel199	1
Grey	3-apart	4	7	4|7	Yel199	1
Grey	3-apart	4	7	4|7	Yel199	1
Grey	3-apart	4	7	4|7	Yel199	1
Grey	3-apart	4	7	4|7	Yel199	1
Grey	3-apart	4	7	4|7	Yel199	1
Grey	3-apart	4	7	4|7	Yel199	1
Grey	3-apart	4	7	4|7	Yel199	1
Grey	3-apart	5	8	5|8	Grn207	1
Grey	3-apart	5	8	5|8	Grn207	1
Grey	3-apart	5	8	5|8	Grn207	1
Grey	3-apart	5	8	5|8	Grn207	1
Grey	3-apart	5	8	5|8	Grn207	1
Grey	3-apart	5	8	5|8	Grn207	1
Grey	3-apart	5	8	5|8	Grn207	1
Grey	3-apart	5	8	5|8	Grn207	1
Grey	3-apart	5	8	5|8	Grn207	1
Grey	3-apart	5	8	5|8	Grn207	1
Grey	3-apart	5	8	5|8	Yel198	1
Grey	3-apart	5	8	5|8	Yel198	1
Grey	3-apart	5	8	5|8	Yel198	1
Grey	3-apart	5	8	5|8	Yel198	1
Grey	3-apart	5	8	5|8	Yel198	1
Grey	3-apart	5	8	5|8	Yel198	1
Grey	3-apart	5	8	5|8	Yel198	1
Grey	3-apart	5	8	5|8	Yel198	1
Grey	3-apart	5	8	5|8	Yel198	1
Grey	3-apart	5	8	5|8	Yel198	1
Grey	3-apart	5	8	5|8	Sil195	1
Grey	3-apart	5	8	5|8	Sil195	1
Grey	3-apart	5	8	5|8	Sil195	1
Grey	3-apart	5	8	5|8	Sil195	1
Grey	3-apart	5	8	5|8	Sil195	1
Grey	3-apart	5	8	5|8	Sil195	1
Grey	3-apart	5	8	5|8	Sil195	1
Grey	3-apart	5	8	5|8	Sil195	1
Grey	3-apart	5	8	5|8	Sil195	1
Grey	3-apart	5	8	5|8	Sil195	1
Grey	3-apart	5	8	5|8	Yel262	1
Grey	3-apart	5	8	5|8	Yel262	1
Grey	3-apart	5	8	5|8	Yel262	1
Grey	3-apart	5	8	5|8	Yel262	1
Grey	3-apart	5	8	5|8	Yel262	1
Grey	3-apart	5	8	5|8	Yel262	1
Grey	3-apart	5	8	5|8	Yel262	1
Grey	3-apart	5	8	5|8	Yel262	1
Grey	3-apart	5	8	5|8	Yel262	1
Grey	3-apart	5	8	5|8	Yel262	1
Grey	3-apart	5	8	5|8	Or189	1
Grey	3-apart	5	8	5|8	Or189	1
Grey	3-apart	5	8	5|8	Or189	1
Grey	3-apart	5	8	5|8	Or189	1
Grey	3-apart	5	8	5|8	Or189	1
Grey	3-apart	5	8	5|8	Or189	1
Grey	3-apart	5	8	5|8	Or189	1
Grey	3-apart	5	8	5|8	Or189	1
Grey	3-apart	5	8	5|8	Or189	1
Grey	3-apart	5	8	5|8	Or189	1
Grey	3-apart	5	8	5|8	Yel199	0
Grey	3-apart	5	8	5|8	Yel199	1
Grey	3-apart	5	8	5|8	Yel199	1
Grey	3-apart	5	8	5|8	Yel199	1
Grey	3-apart	5	8	5|8	Yel199	1
Grey	3-apart	5	8	5|8	Yel199	1
Grey	3-apart	5	8	5|8	Yel199	1
Grey	3-apart	5	8	5|8	Yel199	1
Grey	3-apart	5	8	5|8	Yel199	1
Grey	3-apart	5	8	5|8	Yel199	1
Grey	2-apart	3	5	3|5	Grn207	0
Grey	2-apart	3	5	3|5	Grn207	0
Grey	2-apart	3	5	3|5	Grn207	0
Grey	2-apart	3	5	3|5	Grn207	1
Grey	2-apart	3	5	3|5	Grn207	1
Grey	2-apart	3	5	3|5	Grn207	1
Grey	2-apart	3	5	3|5	Grn207	1
Grey	2-apart	3	5	3|5	Grn207	1
Grey	2-apart	3	5	3|5	Grn207	1
Grey	2-apart	3	5	3|5	Grn207	1
Grey	2-apart	3	5	3|5	Yel198	0
Grey	2-apart	3	5	3|5	Yel198	0
Grey	2-apart	3	5	3|5	Yel198	0
Grey	2-apart	3	5	3|5	Yel198	0
Grey	2-apart	3	5	3|5	Yel198	0
Grey	2-apart	3	5	3|5	Yel198	0
Grey	2-apart	3	5	3|5	Yel198	0
Grey	2-apart	3	5	3|5	Yel198	1
Grey	2-apart	3	5	3|5	Yel198	1
Grey	2-apart	3	5	3|5	Yel198	1
Grey	2-apart	3	5	3|5	Sil195	0
Grey	2-apart	3	5	3|5	Sil195	0
Grey	2-apart	3	5	3|5	Sil195	1
Grey	2-apart	3	5	3|5	Sil195	1
Grey	2-apart	3	5	3|5	Sil195	1
Grey	2-apart	3	5	3|5	Sil195	1
Grey	2-apart	3	5	3|5	Sil195	1
Grey	2-apart	3	5	3|5	Sil195	1
Grey	2-apart	3	5	3|5	Sil195	1
Grey	2-apart	3	5	3|5	Sil195	1
Grey	2-apart	3	5	3|5	Yel262	0
Grey	2-apart	3	5	3|5	Yel262	0
Grey	2-apart	3	5	3|5	Yel262	0
Grey	2-apart	3	5	3|5	Yel262	0
Grey	2-apart	3	5	3|5	Yel262	1
Grey	2-apart	3	5	3|5	Yel262	1
Grey	2-apart	3	5	3|5	Yel262	1
Grey	2-apart	3	5	3|5	Yel262	1
Grey	2-apart	3	5	3|5	Yel262	1
Grey	2-apart	3	5	3|5	Yel262	1
Grey	2-apart	3	5	3|5	Or189	0
Grey	2-apart	3	5	3|5	Or189	0
Grey	2-apart	3	5	3|5	Or189	0
Grey	2-apart	3	5	3|5	Or189	1
Grey	2-apart	3	5	3|5	Or189	1
Grey	2-apart	3	5	3|5	Or189	1
Grey	2-apart	3	5	3|5	Or189	1
Grey	2-apart	3	5	3|5	Or189	1
Grey	2-apart	3	5	3|5	Or189	1
Grey	2-apart	3	5	3|5	Or189	1
Grey	2-apart	3	5	3|5	Yel199	0
Grey	2-apart	3	5	3|5	Yel199	0
Grey	2-apart	3	5	3|5	Yel199	0
Grey	2-apart	3	5	3|5	Yel199	0
Grey	2-apart	3	5	3|5	Yel199	0
Grey	2-apart	3	5	3|5	Yel199	1
Grey	2-apart	3	5	3|5	Yel199	1
Grey	2-apart	3	5	3|5	Yel199	1
Grey	2-apart	3	5	3|5	Yel199	1
Grey	2-apart	3	5	3|5	Yel199	1
Grey	2-apart	4	6	4|6	Grn207	0
Grey	2-apart	4	6	4|6	Grn207	1
Grey	2-apart	4	6	4|6	Grn207	1
Grey	2-apart	4	6	4|6	Grn207	1
Grey	2-apart	4	6	4|6	Grn207	1
Grey	2-apart	4	6	4|6	Grn207	1
Grey	2-apart	4	6	4|6	Grn207	1
Grey	2-apart	4	6	4|6	Grn207	1
Grey	2-apart	4	6	4|6	Grn207	1
Grey	2-apart	4	6	4|6	Grn207	1
Grey	2-apart	4	6	4|6	Yel198	0
Grey	2-apart	4	6	4|6	Yel198	1
Grey	2-apart	4	6	4|6	Yel198	1
Grey	2-apart	4	6	4|6	Yel198	1
Grey	2-apart	4	6	4|6	Yel198	1
Grey	2-apart	4	6	4|6	Yel198	1
Grey	2-apart	4	6	4|6	Yel198	1
Grey	2-apart	4	6	4|6	Yel198	1
Grey	2-apart	4	6	4|6	Yel198	1
Grey	2-apart	4	6	4|6	Yel198	1
Grey	2-apart	4	6	4|6	Sil195	0
Grey	2-apart	4	6	4|6	Sil195	1
Grey	2-apart	4	6	4|6	Sil195	1
Grey	2-apart	4	6	4|6	Sil195	1
Grey	2-apart	4	6	4|6	Sil195	1
Grey	2-apart	4	6	4|6	Sil195	1
Grey	2-apart	4	6	4|6	Sil195	1
Grey	2-apart	4	6	4|6	Sil195	1
Grey	2-apart	4	6	4|6	Sil195	1
Grey	2-apart	4	6	4|6	Sil195	1
Grey	2-apart	4	6	4|6	Yel262	0
Grey	2-apart	4	6	4|6	Yel262	0
Grey	2-apart	4	6	4|6	Yel262	0
Grey	2-apart	4	6	4|6	Yel262	1
Grey	2-apart	4	6	4|6	Yel262	1
Grey	2-apart	4	6	4|6	Yel262	1
Grey	2-apart	4	6	4|6	Yel262	1
Grey	2-apart	4	6	4|6	Yel262	1
Grey	2-apart	4	6	4|6	Yel262	1
Grey	2-apart	4	6	4|6	Yel262	1
Grey	2-apart	4	6	4|6	Or189	1
Grey	2-apart	4	6	4|6	Or189	1
Grey	2-apart	4	6	4|6	Or189	1
Grey	2-apart	4	6	4|6	Or189	1
Grey	2-apart	4	6	4|6	Or189	1
Grey	2-apart	4	6	4|6	Or189	1
Grey	2-apart	4	6	4|6	Or189	1
Grey	2-apart	4	6	4|6	Or189	1
Grey	2-apart	4	6	4|6	Or189	1
Grey	2-apart	4	6	4|6	Or189	1
Grey	2-apart	4	6	4|6	Yel199	0
Grey	2-apart	4	6	4|6	Yel199	1
Grey	2-apart	4	6	4|6	Yel199	1
Grey	2-apart	4	6	4|6	Yel199	1
Grey	2-apart	4	6	4|6	Yel199	1
Grey	2-apart	4	6	4|6	Yel199	1
Grey	2-apart	4	6	4|6	Yel199	1
Grey	2-apart	4	6	4|6	Yel199	1
Grey	2-apart	4	6	4|6	Yel199	1
Grey	2-apart	4	6	4|6	Yel199	1
Grey	2-apart	5	7	5|7	Grn207	0
Grey	2-apart	5	7	5|7	Grn207	0
Grey	2-apart	5	7	5|7	Grn207	0
Grey	2-apart	5	7	5|7	Grn207	0
Grey	2-apart	5	7	5|7	Grn207	0
Grey	2-apart	5	7	5|7	Grn207	1
Grey	2-apart	5	7	5|7	Grn207	1
Grey	2-apart	5	7	5|7	Grn207	1
Grey	2-apart	5	7	5|7	Grn207	1
Grey	2-apart	5	7	5|7	Grn207	1
Grey	2-apart	5	7	5|7	Yel198	0
Grey	2-apart	5	7	5|7	Yel198	0
Grey	2-apart	5	7	5|7	Yel198	0
Grey	2-apart	5	7	5|7	Yel198	0
Grey	2-apart	5	7	5|7	Yel198	0
Grey	2-apart	5	7	5|7	Yel198	1
Grey	2-apart	5	7	5|7	Yel198	1
Grey	2-apart	5	7	5|7	Yel198	1
Grey	2-apart	5	7	5|7	Yel198	1
Grey	2-apart	5	7	5|7	Yel198	1
Grey	2-apart	5	7	5|7	Sil195	0
Grey	2-apart	5	7	5|7	Sil195	0
Grey	2-apart	5	7	5|7	Sil195	1
Grey	2-apart	5	7	5|7	Sil195	1
Grey	2-apart	5	7	5|7	Sil195	1
Grey	2-apart	5	7	5|7	Sil195	1
Grey	2-apart	5	7	5|7	Sil195	1
Grey	2-apart	5	7	5|7	Sil195	1
Grey	2-apart	5	7	5|7	Sil195	1
Grey	2-apart	5	7	5|7	Sil195	1
Grey	2-apart	5	7	5|7	Yel262	0
Grey	2-apart	5	7	5|7	Yel262	1
Grey	2-apart	5	7	5|7	Yel262	1
Grey	2-apart	5	7	5|7	Yel262	1
Grey	2-apart	5	7	5|7	Yel262	1
Grey	2-apart	5	7	5|7	Yel262	1
Grey	2-apart	5	7	5|7	Yel262	1
Grey	2-apart	5	7	5|7	Yel262	1
Grey	2-apart	5	7	5|7	Yel262	1
Grey	2-apart	5	7	5|7	Yel262	1
Grey	2-apart	5	7	5|7	Or189	1
Grey	2-apart	5	7	5|7	Or189	1
Grey	2-apart	5	7	5|7	Or189	1
Grey	2-apart	5	7	5|7	Or189	1
Grey	2-apart	5	7	5|7	Or189	1
Grey	2-apart	5	7	5|7	Or189	1
Grey	2-apart	5	7	5|7	Or189	1
Grey	2-apart	5	7	5|7	Or189	1
Grey	2-apart	5	7	5|7	Or189	1
Grey	2-apart	5	7	5|7	Or189	1
Grey	2-apart	5	7	5|7	Yel199	0
Grey	2-apart	5	7	5|7	Yel199	0
Grey	2-apart	5	7	5|7	Yel199	0
Grey	2-apart	5	7	5|7	Yel199	0
Grey	2-apart	5	7	5|7	Yel199	0
Grey	2-apart	5	7	5|7	Yel199	1
Grey	2-apart	5	7	5|7	Yel199	1
Grey	2-apart	5	7	5|7	Yel199	1
Grey	2-apart	5	7	5|7	Yel199	1
Grey	2-apart	5	7	5|7	Yel199	1
Grey	2-apart	6	8	6|8	Grn207	0
Grey	2-apart	6	8	6|8	Grn207	0
Grey	2-apart	6	8	6|8	Grn207	0
Grey	2-apart	6	8	6|8	Grn207	0
Grey	2-apart	6	8	6|8	Grn207	0
Grey	2-apart	6	8	6|8	Grn207	0
Grey	2-apart	6	8	6|8	Grn207	0
Grey	2-apart	6	8	6|8	Grn207	0
Grey	2-apart	6	8	6|8	Grn207	1
Grey	2-apart	6	8	6|8	Grn207	1
Grey	2-apart	6	8	6|8	Yel198	0
Grey	2-apart	6	8	6|8	Yel198	0
Grey	2-apart	6	8	6|8	Yel198	0
Grey	2-apart	6	8	6|8	Yel198	0
Grey	2-apart	6	8	6|8	Yel198	0
Grey	2-apart	6	8	6|8	Yel198	0
Grey	2-apart	6	8	6|8	Yel198	0
Grey	2-apart	6	8	6|8	Yel198	0
Grey	2-apart	6	8	6|8	Yel198	1
Grey	2-apart	6	8	6|8	Yel198	1
Grey	2-apart	6	8	6|8	Sil195	0
Grey	2-apart	6	8	6|8	Sil195	0
Grey	2-apart	6	8	6|8	Sil195	0
Grey	2-apart	6	8	6|8	Sil195	1
Grey	2-apart	6	8	6|8	Sil195	1
Grey	2-apart	6	8	6|8	Sil195	1
Grey	2-apart	6	8	6|8	Sil195	1
Grey	2-apart	6	8	6|8	Sil195	1
Grey	2-apart	6	8	6|8	Sil195	1
Grey	2-apart	6	8	6|8	Sil195	1
Grey	2-apart	6	8	6|8	Yel262	0
Grey	2-apart	6	8	6|8	Yel262	0
Grey	2-apart	6	8	6|8	Yel262	0
Grey	2-apart	6	8	6|8	Yel262	1
Grey	2-apart	6	8	6|8	Yel262	1
Grey	2-apart	6	8	6|8	Yel262	1
Grey	2-apart	6	8	6|8	Yel262	1
Grey	2-apart	6	8	6|8	Yel262	1
Grey	2-apart	6	8	6|8	Yel262	1
Grey	2-apart	6	8	6|8	Yel262	1
Grey	2-apart	6	8	6|8	Or189	0
Grey	2-apart	6	8	6|8	Or189	1
Grey	2-apart	6	8	6|8	Or189	1
Grey	2-apart	6	8	6|8	Or189	1
Grey	2-apart	6	8	6|8	Or189	1
Grey	2-apart	6	8	6|8	Or189	1
Grey	2-apart	6	8	6|8	Or189	1
Grey	2-apart	6	8	6|8	Or189	1
Grey	2-apart	6	8	6|8	Or189	1
Grey	2-apart	6	8	6|8	Or189	1
Grey	2-apart	6	8	6|8	Yel199	0
Grey	2-apart	6	8	6|8	Yel199	0
Grey	2-apart	6	8	6|8	Yel199	0
Grey	2-apart	6	8	6|8	Yel199	0
Grey	2-apart	6	8	6|8	Yel199	1
Grey	2-apart	6	8	6|8	Yel199	1
Grey	2-apart	6	8	6|8	Yel199	1
Grey	2-apart	6	8	6|8	Yel199	1
Grey	2-apart	6	8	6|8	Yel199	1
Grey	2-apart	6	8	6|8	Yel199	1
Grey	1-apart	3	4	3|4	Grn207	0
Grey	1-apart	3	4	3|4	Grn207	0
Grey	1-apart	3	4	3|4	Grn207	0
Grey	1-apart	3	4	3|4	Grn207	0
Grey	1-apart	3	4	3|4	Grn207	0
Grey	1-apart	3	4	3|4	Grn207	0
Grey	1-apart	3	4	3|4	Grn207	0
Grey	1-apart	3	4	3|4	Grn207	0
Grey	1-apart	3	4	3|4	Grn207	1
Grey	1-apart	3	4	3|4	Grn207	1
Grey	1-apart	3	4	3|4	Yel198	0
Grey	1-apart	3	4	3|4	Yel198	0
Grey	1-apart	3	4	3|4	Yel198	0
Grey	1-apart	3	4	3|4	Yel198	0
Grey	1-apart	3	4	3|4	Yel198	0
Grey	1-apart	3	4	3|4	Yel198	1
Grey	1-apart	3	4	3|4	Yel198	1
Grey	1-apart	3	4	3|4	Yel198	1
Grey	1-apart	3	4	3|4	Yel198	1
Grey	1-apart	3	4	3|4	Yel198	1
Grey	1-apart	3	4	3|4	Sil195	0
Grey	1-apart	3	4	3|4	Sil195	0
Grey	1-apart	3	4	3|4	Sil195	0
Grey	1-apart	3	4	3|4	Sil195	0
Grey	1-apart	3	4	3|4	Sil195	0
Grey	1-apart	3	4	3|4	Sil195	0
Grey	1-apart	3	4	3|4	Sil195	0
Grey	1-apart	3	4	3|4	Sil195	0
Grey	1-apart	3	4	3|4	Sil195	0
Grey	1-apart	3	4	3|4	Sil195	1
Grey	1-apart	3	4	3|4	Yel262	0
Grey	1-apart	3	4	3|4	Yel262	0
Grey	1-apart	3	4	3|4	Yel262	0
Grey	1-apart	3	4	3|4	Yel262	0
Grey	1-apart	3	4	3|4	Yel262	0
Grey	1-apart	3	4	3|4	Yel262	0
Grey	1-apart	3	4	3|4	Yel262	0
Grey	1-apart	3	4	3|4	Yel262	0
Grey	1-apart	3	4	3|4	Yel262	0
Grey	1-apart	3	4	3|4	Yel262	0
Grey	1-apart	3	4	3|4	Or189	0
Grey	1-apart	3	4	3|4	Or189	0
Grey	1-apart	3	4	3|4	Or189	0
Grey	1-apart	3	4	3|4	Or189	0
Grey	1-apart	3	4	3|4	Or189	0
Grey	1-apart	3	4	3|4	Or189	0
Grey	1-apart	3	4	3|4	Or189	0
Grey	1-apart	3	4	3|4	Or189	0
Grey	1-apart	3	4	3|4	Or189	1
Grey	1-apart	3	4	3|4	Or189	1
Grey	1-apart	3	4	3|4	Yel199	0
Grey	1-apart	3	4	3|4	Yel199	0
Grey	1-apart	3	4	3|4	Yel199	0
Grey	1-apart	3	4	3|4	Yel199	0
Grey	1-apart	3	4	3|4	Yel199	0
Grey	1-apart	3	4	3|4	Yel199	0
Grey	1-apart	3	4	3|4	Yel199	0
Grey	1-apart	3	4	3|4	Yel199	0
Grey	1-apart	3	4	3|4	Yel199	0
Grey	1-apart	3	4	3|4	Yel199	1
Grey	1-apart	4	5	4|5	Grn207	0
Grey	1-apart	4	5	4|5	Grn207	0
Grey	1-apart	4	5	4|5	Grn207	0
Grey	1-apart	4	5	4|5	Grn207	0
Grey	1-apart	4	5	4|5	Grn207	0
Grey	1-apart	4	5	4|5	Grn207	1
Grey	1-apart	4	5	4|5	Grn207	1
Grey	1-apart	4	5	4|5	Grn207	1
Grey	1-apart	4	5	4|5	Grn207	1
Grey	1-apart	4	5	4|5	Grn207	1
Grey	1-apart	4	5	4|5	Yel198	0
Grey	1-apart	4	5	4|5	Yel198	0
Grey	1-apart	4	5	4|5	Yel198	0
Grey	1-apart	4	5	4|5	Yel198	0
Grey	1-apart	4	5	4|5	Yel198	0
Grey	1-apart	4	5	4|5	Yel198	0
Grey	1-apart	4	5	4|5	Yel198	0
Grey	1-apart	4	5	4|5	Yel198	0
Grey	1-apart	4	5	4|5	Yel198	0
Grey	1-apart	4	5	4|5	Yel198	1
Grey	1-apart	4	5	4|5	Sil195	0
Grey	1-apart	4	5	4|5	Sil195	0
Grey	1-apart	4	5	4|5	Sil195	0
Grey	1-apart	4	5	4|5	Sil195	0
Grey	1-apart	4	5	4|5	Sil195	0
Grey	1-apart	4	5	4|5	Sil195	1
Grey	1-apart	4	5	4|5	Sil195	1
Grey	1-apart	4	5	4|5	Sil195	1
Grey	1-apart	4	5	4|5	Sil195	1
Grey	1-apart	4	5	4|5	Sil195	1
Grey	1-apart	4	5	4|5	Yel262	0
Grey	1-apart	4	5	4|5	Yel262	0
Grey	1-apart	4	5	4|5	Yel262	0
Grey	1-apart	4	5	4|5	Yel262	0
Grey	1-apart	4	5	4|5	Yel262	0
Grey	1-apart	4	5	4|5	Yel262	0
Grey	1-apart	4	5	4|5	Yel262	0
Grey	1-apart	4	5	4|5	Yel262	0
Grey	1-apart	4	5	4|5	Yel262	0
Grey	1-apart	4	5	4|5	Yel262	1
Grey	1-apart	4	5	4|5	Or189	0
Grey	1-apart	4	5	4|5	Or189	0
Grey	1-apart	4	5	4|5	Or189	0
Grey	1-apart	4	5	4|5	Or189	0
Grey	1-apart	4	5	4|5	Or189	0
Grey	1-apart	4	5	4|5	Or189	1
Grey	1-apart	4	5	4|5	Or189	1
Grey	1-apart	4	5	4|5	Or189	1
Grey	1-apart	4	5	4|5	Or189	1
Grey	1-apart	4	5	4|5	Or189	1
Grey	1-apart	4	5	4|5	Yel199	0
Grey	1-apart	4	5	4|5	Yel199	0
Grey	1-apart	4	5	4|5	Yel199	0
Grey	1-apart	4	5	4|5	Yel199	0
Grey	1-apart	4	5	4|5	Yel199	0
Grey	1-apart	4	5	4|5	Yel199	0
Grey	1-apart	4	5	4|5	Yel199	0
Grey	1-apart	4	5	4|5	Yel199	0
Grey	1-apart	4	5	4|5	Yel199	0
Grey	1-apart	4	5	4|5	Yel199	1
Grey	1-apart	5	6	5|6	Grn207	0
Grey	1-apart	5	6	5|6	Grn207	0
Grey	1-apart	5	6	5|6	Grn207	0
Grey	1-apart	5	6	5|6	Grn207	0
Grey	1-apart	5	6	5|6	Grn207	0
Grey	1-apart	5	6	5|6	Grn207	0
Grey	1-apart	5	6	5|6	Grn207	0
Grey	1-apart	5	6	5|6	Grn207	0
Grey	1-apart	5	6	5|6	Grn207	0
Grey	1-apart	5	6	5|6	Grn207	0
Grey	1-apart	5	6	5|6	Yel198	0
Grey	1-apart	5	6	5|6	Yel198	0
Grey	1-apart	5	6	5|6	Yel198	0
Grey	1-apart	5	6	5|6	Yel198	0
Grey	1-apart	5	6	5|6	Yel198	0
Grey	1-apart	5	6	5|6	Yel198	0
Grey	1-apart	5	6	5|6	Yel198	0
Grey	1-apart	5	6	5|6	Yel198	1
Grey	1-apart	5	6	5|6	Yel198	1
Grey	1-apart	5	6	5|6	Yel198	1
Grey	1-apart	5	6	5|6	Sil195	0
Grey	1-apart	5	6	5|6	Sil195	0
Grey	1-apart	5	6	5|6	Sil195	0
Grey	1-apart	5	6	5|6	Sil195	0
Grey	1-apart	5	6	5|6	Sil195	1
Grey	1-apart	5	6	5|6	Sil195	1
Grey	1-apart	5	6	5|6	Sil195	1
Grey	1-apart	5	6	5|6	Sil195	1
Grey	1-apart	5	6	5|6	Sil195	1
Grey	1-apart	5	6	5|6	Sil195	1
Grey	1-apart	5	6	5|6	Yel262	0
Grey	1-apart	5	6	5|6	Yel262	0
Grey	1-apart	5	6	5|6	Yel262	0
Grey	1-apart	5	6	5|6	Yel262	0
Grey	1-apart	5	6	5|6	Yel262	0
Grey	1-apart	5	6	5|6	Yel262	0
Grey	1-apart	5	6	5|6	Yel262	0
Grey	1-apart	5	6	5|6	Yel262	0
Grey	1-apart	5	6	5|6	Yel262	1
Grey	1-apart	5	6	5|6	Yel262	1
Grey	1-apart	5	6	5|6	Or189	0
Grey	1-apart	5	6	5|6	Or189	0
Grey	1-apart	5	6	5|6	Or189	0
Grey	1-apart	5	6	5|6	Or189	1
Grey	1-apart	5	6	5|6	Or189	1
Grey	1-apart	5	6	5|6	Or189	1
Grey	1-apart	5	6	5|6	Or189	1
Grey	1-apart	5	6	5|6	Or189	1
Grey	1-apart	5	6	5|6	Or189	1
Grey	1-apart	5	6	5|6	Or189	1
Grey	1-apart	5	6	5|6	Yel199	0
Grey	1-apart	5	6	5|6	Yel199	0
Grey	1-apart	5	6	5|6	Yel199	0
Grey	1-apart	5	6	5|6	Yel199	0
Grey	1-apart	5	6	5|6	Yel199	1
Grey	1-apart	5	6	5|6	Yel199	1
Grey	1-apart	5	6	5|6	Yel199	1
Grey	1-apart	5	6	5|6	Yel199	1
Grey	1-apart	5	6	5|6	Yel199	1
Grey	1-apart	5	6	5|6	Yel199	1
Grey	1-apart	6	7	6|7	Grn207	0
Grey	1-apart	6	7	6|7	Grn207	0
Grey	1-apart	6	7	6|7	Grn207	0
Grey	1-apart	6	7	6|7	Grn207	0
Grey	1-apart	6	7	6|7	Grn207	0
Grey	1-apart	6	7	6|7	Grn207	0
Grey	1-apart	6	7	6|7	Grn207	0
Grey	1-apart	6	7	6|7	Grn207	0
Grey	1-apart	6	7	6|7	Grn207	0
Grey	1-apart	6	7	6|7	Grn207	1
Grey	1-apart	6	7	6|7	Yel198	0
Grey	1-apart	6	7	6|7	Yel198	0
Grey	1-apart	6	7	6|7	Yel198	0
Grey	1-apart	6	7	6|7	Yel198	0
Grey	1-apart	6	7	6|7	Yel198	0
Grey	1-apart	6	7	6|7	Yel198	0
Grey	1-apart	6	7	6|7	Yel198	0
Grey	1-apart	6	7	6|7	Yel198	0
Grey	1-apart	6	7	6|7	Yel198	0
Grey	1-apart	6	7	6|7	Yel198	1
Grey	1-apart	6	7	6|7	Sil195	0
Grey	1-apart	6	7	6|7	Sil195	0
Grey	1-apart	6	7	6|7	Sil195	0
Grey	1-apart	6	7	6|7	Sil195	1
Grey	1-apart	6	7	6|7	Sil195	1
Grey	1-apart	6	7	6|7	Sil195	1
Grey	1-apart	6	7	6|7	Sil195	1
Grey	1-apart	6	7	6|7	Sil195	1
Grey	1-apart	6	7	6|7	Sil195	1
Grey	1-apart	6	7	6|7	Sil195	1
Grey	1-apart	6	7	6|7	Yel262	0
Grey	1-apart	6	7	6|7	Yel262	0
Grey	1-apart	6	7	6|7	Yel262	0
Grey	1-apart	6	7	6|7	Yel262	0
Grey	1-apart	6	7	6|7	Yel262	0
Grey	1-apart	6	7	6|7	Yel262	0
Grey	1-apart	6	7	6|7	Yel262	1
Grey	1-apart	6	7	6|7	Yel262	1
Grey	1-apart	6	7	6|7	Yel262	1
Grey	1-apart	6	7	6|7	Yel262	1
Grey	1-apart	6	7	6|7	Or189	0
Grey	1-apart	6	7	6|7	Or189	0
Grey	1-apart	6	7	6|7	Or189	0
Grey	1-apart	6	7	6|7	Or189	0
Grey	1-apart	6	7	6|7	Or189	0
Grey	1-apart	6	7	6|7	Or189	0
Grey	1-apart	6	7	6|7	Or189	1
Grey	1-apart	6	7	6|7	Or189	1
Grey	1-apart	6	7	6|7	Or189	1
Grey	1-apart	6	7	6|7	Or189	1
Grey	1-apart	6	7	6|7	Yel199	0
Grey	1-apart	6	7	6|7	Yel199	0
Grey	1-apart	6	7	6|7	Yel199	0
Grey	1-apart	6	7	6|7	Yel199	0
Grey	1-apart	6	7	6|7	Yel199	0
Grey	1-apart	6	7	6|7	Yel199	0
Grey	1-apart	6	7	6|7	Yel199	0
Grey	1-apart	6	7	6|7	Yel199	0
Grey	1-apart	6	7	6|7	Yel199	1
Grey	1-apart	6	7	6|7	Yel199	1
Grey	1-apart	7	8	7|8	Grn207	0
Grey	1-apart	7	8	7|8	Grn207	0
Grey	1-apart	7	8	7|8	Grn207	0
Grey	1-apart	7	8	7|8	Grn207	0
Grey	1-apart	7	8	7|8	Grn207	0
Grey	1-apart	7	8	7|8	Grn207	0
Grey	1-apart	7	8	7|8	Grn207	0
Grey	1-apart	7	8	7|8	Grn207	0
Grey	1-apart	7	8	7|8	Grn207	1
Grey	1-apart	7	8	7|8	Grn207	1
Grey	1-apart	7	8	7|8	Yel198	0
Grey	1-apart	7	8	7|8	Yel198	0
Grey	1-apart	7	8	7|8	Yel198	0
Grey	1-apart	7	8	7|8	Yel198	0
Grey	1-apart	7	8	7|8	Yel198	0
Grey	1-apart	7	8	7|8	Yel198	0
Grey	1-apart	7	8	7|8	Yel198	1
Grey	1-apart	7	8	7|8	Yel198	1
Grey	1-apart	7	8	7|8	Yel198	1
Grey	1-apart	7	8	7|8	Yel198	1
Grey	1-apart	7	8	7|8	Sil195	0
Grey	1-apart	7	8	7|8	Sil195	0
Grey	1-apart	7	8	7|8	Sil195	0
Grey	1-apart	7	8	7|8	Sil195	0
Grey	1-apart	7	8	7|8	Sil195	0
Grey	1-apart	7	8	7|8	Sil195	1
Grey	1-apart	7	8	7|8	Sil195	1
Grey	1-apart	7	8	7|8	Sil195	1
Grey	1-apart	7	8	7|8	Sil195	1
Grey	1-apart	7	8	7|8	Sil195	1
Grey	1-apart	7	8	7|8	Yel262	0
Grey	1-apart	7	8	7|8	Yel262	0
Grey	1-apart	7	8	7|8	Yel262	0
Grey	1-apart	7	8	7|8	Yel262	0
Grey	1-apart	7	8	7|8	Yel262	1
Grey	1-apart	7	8	7|8	Yel262	1
Grey	1-apart	7	8	7|8	Yel262	1
Grey	1-apart	7	8	7|8	Yel262	1
Grey	1-apart	7	8	7|8	Yel262	1
Grey	1-apart	7	8	7|8	Yel262	1
Grey	1-apart	7	8	7|8	Or189	0
Grey	1-apart	7	8	7|8	Or189	0
Grey	1-apart	7	8	7|8	Or189	0
Grey	1-apart	7	8	7|8	Or189	0
Grey	1-apart	7	8	7|8	Or189	0
Grey	1-apart	7	8	7|8	Or189	1
Grey	1-apart	7	8	7|8	Or189	1
Grey	1-apart	7	8	7|8	Or189	1
Grey	1-apart	7	8	7|8	Or189	1
Grey	1-apart	7	8	7|8	Or189	1
Grey	1-apart	7	8	7|8	Yel199	0
Grey	1-apart	7	8	7|8	Yel199	0
Grey	1-apart	7	8	7|8	Yel199	0
Grey	1-apart	7	8	7|8	Yel199	0
Grey	1-apart	7	8	7|8	Yel199	0
Grey	1-apart	7	8	7|8	Yel199	0
Grey	1-apart	7	8	7|8	Yel199	0
Grey	1-apart	7	8	7|8	Yel199	0
Grey	1-apart	7	8	7|8	Yel199	0
Grey	1-apart	7	8	7|8	Yel199	1
Black	5-apart	3	8	3|8	Grn207	0
Black	5-apart	3	8	3|8	Grn207	1
Black	5-apart	3	8	3|8	Grn207	1
Black	5-apart	3	8	3|8	Grn207	1
Black	5-apart	3	8	3|8	Grn207	1
Black	5-apart	3	8	3|8	Grn207	1
Black	5-apart	3	8	3|8	Grn207	1
Black	5-apart	3	8	3|8	Grn207	1
Black	5-apart	3	8	3|8	Grn207	1
Black	5-apart	3	8	3|8	Grn207	1
Black	5-apart	3	8	3|8	Yel198	0
Black	5-apart	3	8	3|8	Yel198	1
Black	5-apart	3	8	3|8	Yel198	1
Black	5-apart	3	8	3|8	Yel198	1
Black	5-apart	3	8	3|8	Yel198	1
Black	5-apart	3	8	3|8	Yel198	1
Black	5-apart	3	8	3|8	Yel198	1
Black	5-apart	3	8	3|8	Yel198	1
Black	5-apart	3	8	3|8	Yel198	1
Black	5-apart	3	8	3|8	Yel198	1
Black	5-apart	3	8	3|8	Sil195	0
Black	5-apart	3	8	3|8	Sil195	1
Black	5-apart	3	8	3|8	Sil195	1
Black	5-apart	3	8	3|8	Sil195	1
Black	5-apart	3	8	3|8	Sil195	1
Black	5-apart	3	8	3|8	Sil195	1
Black	5-apart	3	8	3|8	Sil195	1
Black	5-apart	3	8	3|8	Sil195	1
Black	5-apart	3	8	3|8	Sil195	1
Black	5-apart	3	8	3|8	Sil195	1
Black	5-apart	3	8	3|8	Yel262	1
Black	5-apart	3	8	3|8	Yel262	1
Black	5-apart	3	8	3|8	Yel262	1
Black	5-apart	3	8	3|8	Yel262	1
Black	5-apart	3	8	3|8	Yel262	1
Black	5-apart	3	8	3|8	Yel262	1
Black	5-apart	3	8	3|8	Yel262	1
Black	5-apart	3	8	3|8	Yel262	1
Black	5-apart	3	8	3|8	Yel262	1
Black	5-apart	3	8	3|8	Yel262	1
Black	5-apart	3	8	3|8	Or189	0
Black	5-apart	3	8	3|8	Or189	1
Black	5-apart	3	8	3|8	Or189	1
Black	5-apart	3	8	3|8	Or189	1
Black	5-apart	3	8	3|8	Or189	1
Black	5-apart	3	8	3|8	Or189	1
Black	5-apart	3	8	3|8	Or189	1
Black	5-apart	3	8	3|8	Or189	1
Black	5-apart	3	8	3|8	Or189	1
Black	5-apart	3	8	3|8	Or189	1
Black	5-apart	3	8	3|8	Yel199	0
Black	5-apart	3	8	3|8	Yel199	1
Black	5-apart	3	8	3|8	Yel199	1
Black	5-apart	3	8	3|8	Yel199	1
Black	5-apart	3	8	3|8	Yel199	1
Black	5-apart	3	8	3|8	Yel199	1
Black	5-apart	3	8	3|8	Yel199	1
Black	5-apart	3	8	3|8	Yel199	1
Black	5-apart	3	8	3|8	Yel199	1
Black	5-apart	3	8	3|8	Yel199	1
Black	4-apart	3	7	3|7	Grn207	1
Black	4-apart	3	7	3|7	Grn207	1
Black	4-apart	3	7	3|7	Grn207	1
Black	4-apart	3	7	3|7	Grn207	1
Black	4-apart	3	7	3|7	Grn207	1
Black	4-apart	3	7	3|7	Grn207	1
Black	4-apart	3	7	3|7	Grn207	1
Black	4-apart	3	7	3|7	Grn207	1
Black	4-apart	3	7	3|7	Grn207	1
Black	4-apart	3	7	3|7	Grn207	1
Black	4-apart	3	7	3|7	Yel198	0
Black	4-apart	3	7	3|7	Yel198	0
Black	4-apart	3	7	3|7	Yel198	1
Black	4-apart	3	7	3|7	Yel198	1
Black	4-apart	3	7	3|7	Yel198	1
Black	4-apart	3	7	3|7	Yel198	1
Black	4-apart	3	7	3|7	Yel198	1
Black	4-apart	3	7	3|7	Yel198	1
Black	4-apart	3	7	3|7	Yel198	1
Black	4-apart	3	7	3|7	Yel198	1
Black	4-apart	3	7	3|7	Sil195	1
Black	4-apart	3	7	3|7	Sil195	1
Black	4-apart	3	7	3|7	Sil195	1
Black	4-apart	3	7	3|7	Sil195	1
Black	4-apart	3	7	3|7	Sil195	1
Black	4-apart	3	7	3|7	Sil195	1
Black	4-apart	3	7	3|7	Sil195	1
Black	4-apart	3	7	3|7	Sil195	1
Black	4-apart	3	7	3|7	Sil195	1
Black	4-apart	3	7	3|7	Sil195	1
Black	4-apart	3	7	3|7	Yel262	1
Black	4-apart	3	7	3|7	Yel262	1
Black	4-apart	3	7	3|7	Yel262	1
Black	4-apart	3	7	3|7	Yel262	1
Black	4-apart	3	7	3|7	Yel262	1
Black	4-apart	3	7	3|7	Yel262	1
Black	4-apart	3	7	3|7	Yel262	1
Black	4-apart	3	7	3|7	Yel262	1
Black	4-apart	3	7	3|7	Yel262	1
Black	4-apart	3	7	3|7	Yel262	1
Black	4-apart	3	7	3|7	Or189	1
Black	4-apart	3	7	3|7	Or189	1
Black	4-apart	3	7	3|7	Or189	1
Black	4-apart	3	7	3|7	Or189	1
Black	4-apart	3	7	3|7	Or189	1
Black	4-apart	3	7	3|7	Or189	1
Black	4-apart	3	7	3|7	Or189	1
Black	4-apart	3	7	3|7	Or189	1
Black	4-apart	3	7	3|7	Or189	1
Black	4-apart	3	7	3|7	Or189	1
Black	4-apart	3	7	3|7	Yel199	1
Black	4-apart	3	7	3|7	Yel199	1
Black	4-apart	3	7	3|7	Yel199	1
Black	4-apart	3	7	3|7	Yel199	1
Black	4-apart	3	7	3|7	Yel199	1
Black	4-apart	3	7	3|7	Yel199	1
Black	4-apart	3	7	3|7	Yel199	1
Black	4-apart	3	7	3|7	Yel199	1
Black	4-apart	3	7	3|7	Yel199	1
Black	4-apart	3	7	3|7	Yel199	1
Black	4-apart	4	8	4|8	Grn207	1
Black	4-apart	4	8	4|8	Grn207	1
Black	4-apart	4	8	4|8	Grn207	1
Black	4-apart	4	8	4|8	Grn207	1
Black	4-apart	4	8	4|8	Grn207	1
Black	4-apart	4	8	4|8	Grn207	1
Black	4-apart	4	8	4|8	Grn207	1
Black	4-apart	4	8	4|8	Grn207	1
Black	4-apart	4	8	4|8	Grn207	1
Black	4-apart	4	8	4|8	Grn207	1
Black	4-apart	4	8	4|8	Yel198	0
Black	4-apart	4	8	4|8	Yel198	1
Black	4-apart	4	8	4|8	Yel198	1
Black	4-apart	4	8	4|8	Yel198	1
Black	4-apart	4	8	4|8	Yel198	1
Black	4-apart	4	8	4|8	Yel198	1
Black	4-apart	4	8	4|8	Yel198	1
Black	4-apart	4	8	4|8	Yel198	1
Black	4-apart	4	8	4|8	Yel198	1
Black	4-apart	4	8	4|8	Yel198	1
Black	4-apart	4	8	4|8	Sil195	1
Black	4-apart	4	8	4|8	Sil195	1
Black	4-apart	4	8	4|8	Sil195	1
Black	4-apart	4	8	4|8	Sil195	1
Black	4-apart	4	8	4|8	Sil195	1
Black	4-apart	4	8	4|8	Sil195	1
Black	4-apart	4	8	4|8	Sil195	1
Black	4-apart	4	8	4|8	Sil195	1
Black	4-apart	4	8	4|8	Sil195	1
Black	4-apart	4	8	4|8	Sil195	1
Black	4-apart	4	8	4|8	Yel262	1
Black	4-apart	4	8	4|8	Yel262	1
Black	4-apart	4	8	4|8	Yel262	1
Black	4-apart	4	8	4|8	Yel262	1
Black	4-apart	4	8	4|8	Yel262	1
Black	4-apart	4	8	4|8	Yel262	1
Black	4-apart	4	8	4|8	Yel262	1
Black	4-apart	4	8	4|8	Yel262	1
Black	4-apart	4	8	4|8	Yel262	1
Black	4-apart	4	8	4|8	Yel262	1
Black	4-apart	4	8	4|8	Or189	0
Black	4-apart	4	8	4|8	Or189	1
Black	4-apart	4	8	4|8	Or189	1
Black	4-apart	4	8	4|8	Or189	1
Black	4-apart	4	8	4|8	Or189	1
Black	4-apart	4	8	4|8	Or189	1
Black	4-apart	4	8	4|8	Or189	1
Black	4-apart	4	8	4|8	Or189	1
Black	4-apart	4	8	4|8	Or189	1
Black	4-apart	4	8	4|8	Or189	1
Black	4-apart	4	8	4|8	Yel199	1
Black	4-apart	4	8	4|8	Yel199	1
Black	4-apart	4	8	4|8	Yel199	1
Black	4-apart	4	8	4|8	Yel199	1
Black	4-apart	4	8	4|8	Yel199	1
Black	4-apart	4	8	4|8	Yel199	1
Black	4-apart	4	8	4|8	Yel199	1
Black	4-apart	4	8	4|8	Yel199	1
Black	4-apart	4	8	4|8	Yel199	1
Black	4-apart	4	8	4|8	Yel199	1
Black	3-apart	3	6	3|6	Grn207	1
Black	3-apart	3	6	3|6	Grn207	1
Black	3-apart	3	6	3|6	Grn207	1
Black	3-apart	3	6	3|6	Grn207	1
Black	3-apart	3	6	3|6	Grn207	1
Black	3-apart	3	6	3|6	Grn207	1
Black	3-apart	3	6	3|6	Grn207	1
Black	3-apart	3	6	3|6	Grn207	1
Black	3-apart	3	6	3|6	Grn207	1
Black	3-apart	3	6	3|6	Grn207	1
Black	3-apart	3	6	3|6	Yel198	0
Black	3-apart	3	6	3|6	Yel198	0
Black	3-apart	3	6	3|6	Yel198	1
Black	3-apart	3	6	3|6	Yel198	1
Black	3-apart	3	6	3|6	Yel198	1
Black	3-apart	3	6	3|6	Yel198	1
Black	3-apart	3	6	3|6	Yel198	1
Black	3-apart	3	6	3|6	Yel198	1
Black	3-apart	3	6	3|6	Yel198	1
Black	3-apart	3	6	3|6	Yel198	1
Black	3-apart	3	6	3|6	Sil195	0
Black	3-apart	3	6	3|6	Sil195	0
Black	3-apart	3	6	3|6	Sil195	0
Black	3-apart	3	6	3|6	Sil195	1
Black	3-apart	3	6	3|6	Sil195	1
Black	3-apart	3	6	3|6	Sil195	1
Black	3-apart	3	6	3|6	Sil195	1
Black	3-apart	3	6	3|6	Sil195	1
Black	3-apart	3	6	3|6	Sil195	1
Black	3-apart	3	6	3|6	Sil195	1
Black	3-apart	3	6	3|6	Yel262	0
Black	3-apart	3	6	3|6	Yel262	0
Black	3-apart	3	6	3|6	Yel262	1
Black	3-apart	3	6	3|6	Yel262	1
Black	3-apart	3	6	3|6	Yel262	1
Black	3-apart	3	6	3|6	Yel262	1
Black	3-apart	3	6	3|6	Yel262	1
Black	3-apart	3	6	3|6	Yel262	1
Black	3-apart	3	6	3|6	Yel262	1
Black	3-apart	3	6	3|6	Yel262	1
Black	3-apart	3	6	3|6	Or189	0
Black	3-apart	3	6	3|6	Or189	1
Black	3-apart	3	6	3|6	Or189	1
Black	3-apart	3	6	3|6	Or189	1
Black	3-apart	3	6	3|6	Or189	1
Black	3-apart	3	6	3|6	Or189	1
Black	3-apart	3	6	3|6	Or189	1
Black	3-apart	3	6	3|6	Or189	1
Black	3-apart	3	6	3|6	Or189	1
Black	3-apart	3	6	3|6	Or189	1
Black	3-apart	3	6	3|6	Yel199	0
Black	3-apart	3	6	3|6	Yel199	0
Black	3-apart	3	6	3|6	Yel199	1
Black	3-apart	3	6	3|6	Yel199	1
Black	3-apart	3	6	3|6	Yel199	1
Black	3-apart	3	6	3|6	Yel199	1
Black	3-apart	3	6	3|6	Yel199	1
Black	3-apart	3	6	3|6	Yel199	1
Black	3-apart	3	6	3|6	Yel199	1
Black	3-apart	3	6	3|6	Yel199	1
Black	3-apart	4	7	4|7	Grn207	1
Black	3-apart	4	7	4|7	Grn207	1
Black	3-apart	4	7	4|7	Grn207	1
Black	3-apart	4	7	4|7	Grn207	1
Black	3-apart	4	7	4|7	Grn207	1
Black	3-apart	4	7	4|7	Grn207	1
Black	3-apart	4	7	4|7	Grn207	1
Black	3-apart	4	7	4|7	Grn207	1
Black	3-apart	4	7	4|7	Grn207	1
Black	3-apart	4	7	4|7	Grn207	1
Black	3-apart	4	7	4|7	Yel198	0
Black	3-apart	4	7	4|7	Yel198	0
Black	3-apart	4	7	4|7	Yel198	0
Black	3-apart	4	7	4|7	Yel198	1
Black	3-apart	4	7	4|7	Yel198	1
Black	3-apart	4	7	4|7	Yel198	1
Black	3-apart	4	7	4|7	Yel198	1
Black	3-apart	4	7	4|7	Yel198	1
Black	3-apart	4	7	4|7	Yel198	1
Black	3-apart	4	7	4|7	Yel198	1
Black	3-apart	4	7	4|7	Sil195	1
Black	3-apart	4	7	4|7	Sil195	1
Black	3-apart	4	7	4|7	Sil195	1
Black	3-apart	4	7	4|7	Sil195	1
Black	3-apart	4	7	4|7	Sil195	1
Black	3-apart	4	7	4|7	Sil195	1
Black	3-apart	4	7	4|7	Sil195	1
Black	3-apart	4	7	4|7	Sil195	1
Black	3-apart	4	7	4|7	Sil195	1
Black	3-apart	4	7	4|7	Sil195	1
Black	3-apart	4	7	4|7	Yel262	0
Black	3-apart	4	7	4|7	Yel262	1
Black	3-apart	4	7	4|7	Yel262	1
Black	3-apart	4	7	4|7	Yel262	1
Black	3-apart	4	7	4|7	Yel262	1
Black	3-apart	4	7	4|7	Yel262	1
Black	3-apart	4	7	4|7	Yel262	1
Black	3-apart	4	7	4|7	Yel262	1
Black	3-apart	4	7	4|7	Yel262	1
Black	3-apart	4	7	4|7	Yel262	1
Black	3-apart	4	7	4|7	Or189	0
Black	3-apart	4	7	4|7	Or189	1
Black	3-apart	4	7	4|7	Or189	1
Black	3-apart	4	7	4|7	Or189	1
Black	3-apart	4	7	4|7	Or189	1
Black	3-apart	4	7	4|7	Or189	1
Black	3-apart	4	7	4|7	Or189	1
Black	3-apart	4	7	4|7	Or189	1
Black	3-apart	4	7	4|7	Or189	1
Black	3-apart	4	7	4|7	Or189	1
Black	3-apart	4	7	4|7	Yel199	1
Black	3-apart	4	7	4|7	Yel199	1
Black	3-apart	4	7	4|7	Yel199	1
Black	3-apart	4	7	4|7	Yel199	1
Black	3-apart	4	7	4|7	Yel199	1
Black	3-apart	4	7	4|7	Yel199	1
Black	3-apart	4	7	4|7	Yel199	1
Black	3-apart	4	7	4|7	Yel199	1
Black	3-apart	4	7	4|7	Yel199	1
Black	3-apart	4	7	4|7	Yel199	1
Black	3-apart	5	8	5|8	Grn207	0
Black	3-apart	5	8	5|8	Grn207	0
Black	3-apart	5	8	5|8	Grn207	1
Black	3-apart	5	8	5|8	Grn207	1
Black	3-apart	5	8	5|8	Grn207	1
Black	3-apart	5	8	5|8	Grn207	1
Black	3-apart	5	8	5|8	Grn207	1
Black	3-apart	5	8	5|8	Grn207	1
Black	3-apart	5	8	5|8	Grn207	1
Black	3-apart	5	8	5|8	Grn207	1
Black	3-apart	5	8	5|8	Yel198	0
Black	3-apart	5	8	5|8	Yel198	0
Black	3-apart	5	8	5|8	Yel198	1
Black	3-apart	5	8	5|8	Yel198	1
Black	3-apart	5	8	5|8	Yel198	1
Black	3-apart	5	8	5|8	Yel198	1
Black	3-apart	5	8	5|8	Yel198	1
Black	3-apart	5	8	5|8	Yel198	1
Black	3-apart	5	8	5|8	Yel198	1
Black	3-apart	5	8	5|8	Yel198	1
Black	3-apart	5	8	5|8	Sil195	1
Black	3-apart	5	8	5|8	Sil195	1
Black	3-apart	5	8	5|8	Sil195	1
Black	3-apart	5	8	5|8	Sil195	1
Black	3-apart	5	8	5|8	Sil195	1
Black	3-apart	5	8	5|8	Sil195	1
Black	3-apart	5	8	5|8	Sil195	1
Black	3-apart	5	8	5|8	Sil195	1
Black	3-apart	5	8	5|8	Sil195	1
Black	3-apart	5	8	5|8	Sil195	1
Black	3-apart	5	8	5|8	Yel262	1
Black	3-apart	5	8	5|8	Yel262	1
Black	3-apart	5	8	5|8	Yel262	1
Black	3-apart	5	8	5|8	Yel262	1
Black	3-apart	5	8	5|8	Yel262	1
Black	3-apart	5	8	5|8	Yel262	1
Black	3-apart	5	8	5|8	Yel262	1
Black	3-apart	5	8	5|8	Yel262	1
Black	3-apart	5	8	5|8	Yel262	1
Black	3-apart	5	8	5|8	Yel262	1
Black	3-apart	5	8	5|8	Or189	0
Black	3-apart	5	8	5|8	Or189	0
Black	3-apart	5	8	5|8	Or189	1
Black	3-apart	5	8	5|8	Or189	1
Black	3-apart	5	8	5|8	Or189	1
Black	3-apart	5	8	5|8	Or189	1
Black	3-apart	5	8	5|8	Or189	1
Black	3-apart	5	8	5|8	Or189	1
Black	3-apart	5	8	5|8	Or189	1
Black	3-apart	5	8	5|8	Or189	1
Black	3-apart	5	8	5|8	Yel199	1
Black	3-apart	5	8	5|8	Yel199	1
Black	3-apart	5	8	5|8	Yel199	1
Black	3-apart	5	8	5|8	Yel199	1
Black	3-apart	5	8	5|8	Yel199	1
Black	3-apart	5	8	5|8	Yel199	1
Black	3-apart	5	8	5|8	Yel199	1
Black	3-apart	5	8	5|8	Yel199	1
Black	3-apart	5	8	5|8	Yel199	1
Black	3-apart	5	8	5|8	Yel199	1
Black	2-apart	3	5	3|5	Grn207	1
Black	2-apart	3	5	3|5	Grn207	1
Black	2-apart	3	5	3|5	Grn207	1
Black	2-apart	3	5	3|5	Grn207	1
Black	2-apart	3	5	3|5	Grn207	1
Black	2-apart	3	5	3|5	Grn207	1
Black	2-apart	3	5	3|5	Grn207	1
Black	2-apart	3	5	3|5	Grn207	1
Black	2-apart	3	5	3|5	Grn207	1
Black	2-apart	3	5	3|5	Grn207	1
Black	2-apart	3	5	3|5	Yel198	0
Black	2-apart	3	5	3|5	Yel198	0
Black	2-apart	3	5	3|5	Yel198	0
Black	2-apart	3	5	3|5	Yel198	0
Black	2-apart	3	5	3|5	Yel198	0
Black	2-apart	3	5	3|5	Yel198	0
Black	2-apart	3	5	3|5	Yel198	0
Black	2-apart	3	5	3|5	Yel198	1
Black	2-apart	3	5	3|5	Yel198	1
Black	2-apart	3	5	3|5	Yel198	1
Black	2-apart	3	5	3|5	Sil195	0
Black	2-apart	3	5	3|5	Sil195	0
Black	2-apart	3	5	3|5	Sil195	1
Black	2-apart	3	5	3|5	Sil195	1
Black	2-apart	3	5	3|5	Sil195	1
Black	2-apart	3	5	3|5	Sil195	1
Black	2-apart	3	5	3|5	Sil195	1
Black	2-apart	3	5	3|5	Sil195	1
Black	2-apart	3	5	3|5	Sil195	1
Black	2-apart	3	5	3|5	Sil195	1
Black	2-apart	3	5	3|5	Yel262	0
Black	2-apart	3	5	3|5	Yel262	0
Black	2-apart	3	5	3|5	Yel262	0
Black	2-apart	3	5	3|5	Yel262	1
Black	2-apart	3	5	3|5	Yel262	1
Black	2-apart	3	5	3|5	Yel262	1
Black	2-apart	3	5	3|5	Yel262	1
Black	2-apart	3	5	3|5	Yel262	1
Black	2-apart	3	5	3|5	Yel262	1
Black	2-apart	3	5	3|5	Yel262	1
Black	2-apart	3	5	3|5	Or189	0
Black	2-apart	3	5	3|5	Or189	0
Black	2-apart	3	5	3|5	Or189	0
Black	2-apart	3	5	3|5	Or189	0
Black	2-apart	3	5	3|5	Or189	0
Black	2-apart	3	5	3|5	Or189	1
Black	2-apart	3	5	3|5	Or189	1
Black	2-apart	3	5	3|5	Or189	1
Black	2-apart	3	5	3|5	Or189	1
Black	2-apart	3	5	3|5	Or189	1
Black	2-apart	3	5	3|5	Yel199	0
Black	2-apart	3	5	3|5	Yel199	0
Black	2-apart	3	5	3|5	Yel199	0
Black	2-apart	3	5	3|5	Yel199	0
Black	2-apart	3	5	3|5	Yel199	0
Black	2-apart	3	5	3|5	Yel199	0
Black	2-apart	3	5	3|5	Yel199	1
Black	2-apart	3	5	3|5	Yel199	1
Black	2-apart	3	5	3|5	Yel199	1
Black	2-apart	3	5	3|5	Yel199	1
Black	2-apart	4	6	4|6	Grn207	1
Black	2-apart	4	6	4|6	Grn207	1
Black	2-apart	4	6	4|6	Grn207	1
Black	2-apart	4	6	4|6	Grn207	1
Black	2-apart	4	6	4|6	Grn207	1
Black	2-apart	4	6	4|6	Grn207	1
Black	2-apart	4	6	4|6	Grn207	1
Black	2-apart	4	6	4|6	Grn207	1
Black	2-apart	4	6	4|6	Grn207	1
Black	2-apart	4	6	4|6	Grn207	1
Black	2-apart	4	6	4|6	Yel198	0
Black	2-apart	4	6	4|6	Yel198	0
Black	2-apart	4	6	4|6	Yel198	0
Black	2-apart	4	6	4|6	Yel198	0
Black	2-apart	4	6	4|6	Yel198	0
Black	2-apart	4	6	4|6	Yel198	1
Black	2-apart	4	6	4|6	Yel198	1
Black	2-apart	4	6	4|6	Yel198	1
Black	2-apart	4	6	4|6	Yel198	1
Black	2-apart	4	6	4|6	Yel198	1
Black	2-apart	4	6	4|6	Sil195	0
Black	2-apart	4	6	4|6	Sil195	0
Black	2-apart	4	6	4|6	Sil195	1
Black	2-apart	4	6	4|6	Sil195	1
Black	2-apart	4	6	4|6	Sil195	1
Black	2-apart	4	6	4|6	Sil195	1
Black	2-apart	4	6	4|6	Sil195	1
Black	2-apart	4	6	4|6	Sil195	1
Black	2-apart	4	6	4|6	Sil195	1
Black	2-apart	4	6	4|6	Sil195	1
Black	2-apart	4	6	4|6	Yel262	0
Black	2-apart	4	6	4|6	Yel262	0
Black	2-apart	4	6	4|6	Yel262	1
Black	2-apart	4	6	4|6	Yel262	1
Black	2-apart	4	6	4|6	Yel262	1
Black	2-apart	4	6	4|6	Yel262	1
Black	2-apart	4	6	4|6	Yel262	1
Black	2-apart	4	6	4|6	Yel262	1
Black	2-apart	4	6	4|6	Yel262	1
Black	2-apart	4	6	4|6	Yel262	1
Black	2-apart	4	6	4|6	Or189	0
Black	2-apart	4	6	4|6	Or189	0
Black	2-apart	4	6	4|6	Or189	1
Black	2-apart	4	6	4|6	Or189	1
Black	2-apart	4	6	4|6	Or189	1
Black	2-apart	4	6	4|6	Or189	1
Black	2-apart	4	6	4|6	Or189	1
Black	2-apart	4	6	4|6	Or189	1
Black	2-apart	4	6	4|6	Or189	1
Black	2-apart	4	6	4|6	Or189	1
Black	2-apart	4	6	4|6	Yel199	0
Black	2-apart	4	6	4|6	Yel199	0
Black	2-apart	4	6	4|6	Yel199	1
Black	2-apart	4	6	4|6	Yel199	1
Black	2-apart	4	6	4|6	Yel199	1
Black	2-apart	4	6	4|6	Yel199	1
Black	2-apart	4	6	4|6	Yel199	1
Black	2-apart	4	6	4|6	Yel199	1
Black	2-apart	4	6	4|6	Yel199	1
Black	2-apart	4	6	4|6	Yel199	1
Black	2-apart	5	7	5|7	Grn207	0
Black	2-apart	5	7	5|7	Grn207	0
Black	2-apart	5	7	5|7	Grn207	0
Black	2-apart	5	7	5|7	Grn207	1
Black	2-apart	5	7	5|7	Grn207	1
Black	2-apart	5	7	5|7	Grn207	1
Black	2-apart	5	7	5|7	Grn207	1
Black	2-apart	5	7	5|7	Grn207	1
Black	2-apart	5	7	5|7	Grn207	1
Black	2-apart	5	7	5|7	Grn207	1
Black	2-apart	5	7	5|7	Yel198	0
Black	2-apart	5	7	5|7	Yel198	0
Black	2-apart	5	7	5|7	Yel198	0
Black	2-apart	5	7	5|7	Yel198	0
Black	2-apart	5	7	5|7	Yel198	1
Black	2-apart	5	7	5|7	Yel198	1
Black	2-apart	5	7	5|7	Yel198	1
Black	2-apart	5	7	5|7	Yel198	1
Black	2-apart	5	7	5|7	Yel198	1
Black	2-apart	5	7	5|7	Yel198	1
Black	2-apart	5	7	5|7	Sil195	0
Black	2-apart	5	7	5|7	Sil195	1
Black	2-apart	5	7	5|7	Sil195	1
Black	2-apart	5	7	5|7	Sil195	1
Black	2-apart	5	7	5|7	Sil195	1
Black	2-apart	5	7	5|7	Sil195	1
Black	2-apart	5	7	5|7	Sil195	1
Black	2-apart	5	7	5|7	Sil195	1
Black	2-apart	5	7	5|7	Sil195	1
Black	2-apart	5	7	5|7	Sil195	1
Black	2-apart	5	7	5|7	Yel262	0
Black	2-apart	5	7	5|7	Yel262	0
Black	2-apart	5	7	5|7	Yel262	0
Black	2-apart	5	7	5|7	Yel262	0
Black	2-apart	5	7	5|7	Yel262	0
Black	2-apart	5	7	5|7	Yel262	1
Black	2-apart	5	7	5|7	Yel262	1
Black	2-apart	5	7	5|7	Yel262	1
Black	2-apart	5	7	5|7	Yel262	1
Black	2-apart	5	7	5|7	Yel262	1
Black	2-apart	5	7	5|7	Or189	0
Black	2-apart	5	7	5|7	Or189	0
Black	2-apart	5	7	5|7	Or189	0
Black	2-apart	5	7	5|7	Or189	0
Black	2-apart	5	7	5|7	Or189	1
Black	2-apart	5	7	5|7	Or189	1
Black	2-apart	5	7	5|7	Or189	1
Black	2-apart	5	7	5|7	Or189	1
Black	2-apart	5	7	5|7	Or189	1
Black	2-apart	5	7	5|7	Or189	1
Black	2-apart	5	7	5|7	Yel199	0
Black	2-apart	5	7	5|7	Yel199	0
Black	2-apart	5	7	5|7	Yel199	0
Black	2-apart	5	7	5|7	Yel199	0
Black	2-apart	5	7	5|7	Yel199	1
Black	2-apart	5	7	5|7	Yel199	1
Black	2-apart	5	7	5|7	Yel199	1
Black	2-apart	5	7	5|7	Yel199	1
Black	2-apart	5	7	5|7	Yel199	1
Black	2-apart	5	7	5|7	Yel199	1
Black	2-apart	6	8	6|8	Grn207	0
Black	2-apart	6	8	6|8	Grn207	0
Black	2-apart	6	8	6|8	Grn207	0
Black	2-apart	6	8	6|8	Grn207	0
Black	2-apart	6	8	6|8	Grn207	0
Black	2-apart	6	8	6|8	Grn207	0
Black	2-apart	6	8	6|8	Grn207	1
Black	2-apart	6	8	6|8	Grn207	1
Black	2-apart	6	8	6|8	Grn207	1
Black	2-apart	6	8	6|8	Grn207	1
Black	2-apart	6	8	6|8	Yel198	0
Black	2-apart	6	8	6|8	Yel198	0
Black	2-apart	6	8	6|8	Yel198	0
Black	2-apart	6	8	6|8	Yel198	0
Black	2-apart	6	8	6|8	Yel198	0
Black	2-apart	6	8	6|8	Yel198	0
Black	2-apart	6	8	6|8	Yel198	1
Black	2-apart	6	8	6|8	Yel198	1
Black	2-apart	6	8	6|8	Yel198	1
Black	2-apart	6	8	6|8	Yel198	1
Black	2-apart	6	8	6|8	Sil195	0
Black	2-apart	6	8	6|8	Sil195	0
Black	2-apart	6	8	6|8	Sil195	0
Black	2-apart	6	8	6|8	Sil195	0
Black	2-apart	6	8	6|8	Sil195	0
Black	2-apart	6	8	6|8	Sil195	0
Black	2-apart	6	8	6|8	Sil195	1
Black	2-apart	6	8	6|8	Sil195	1
Black	2-apart	6	8	6|8	Sil195	1
Black	2-apart	6	8	6|8	Sil195	1
Black	2-apart	6	8	6|8	Yel262	0
Black	2-apart	6	8	6|8	Yel262	0
Black	2-apart	6	8	6|8	Yel262	0
Black	2-apart	6	8	6|8	Yel262	0
Black	2-apart	6	8	6|8	Yel262	1
Black	2-apart	6	8	6|8	Yel262	1
Black	2-apart	6	8	6|8	Yel262	1
Black	2-apart	6	8	6|8	Yel262	1
Black	2-apart	6	8	6|8	Yel262	1
Black	2-apart	6	8	6|8	Yel262	1
Black	2-apart	6	8	6|8	Or189	0
Black	2-apart	6	8	6|8	Or189	0
Black	2-apart	6	8	6|8	Or189	1
Black	2-apart	6	8	6|8	Or189	1
Black	2-apart	6	8	6|8	Or189	1
Black	2-apart	6	8	6|8	Or189	1
Black	2-apart	6	8	6|8	Or189	1
Black	2-apart	6	8	6|8	Or189	1
Black	2-apart	6	8	6|8	Or189	1
Black	2-apart	6	8	6|8	Or189	1
Black	2-apart	6	8	6|8	Yel199	0
Black	2-apart	6	8	6|8	Yel199	0
Black	2-apart	6	8	6|8	Yel199	1
Black	2-apart	6	8	6|8	Yel199	1
Black	2-apart	6	8	6|8	Yel199	1
Black	2-apart	6	8	6|8	Yel199	1
Black	2-apart	6	8	6|8	Yel199	1
Black	2-apart	6	8	6|8	Yel199	1
Black	2-apart	6	8	6|8	Yel199	1
Black	2-apart	6	8	6|8	Yel199	1
Black	1-apart	3	4	3|4	Grn207	0
Black	1-apart	3	4	3|4	Grn207	0
Black	1-apart	3	4	3|4	Grn207	0
Black	1-apart	3	4	3|4	Grn207	0
Black	1-apart	3	4	3|4	Grn207	0
Black	1-apart	3	4	3|4	Grn207	0
Black	1-apart	3	4	3|4	Grn207	0
Black	1-apart	3	4	3|4	Grn207	0
Black	1-apart	3	4	3|4	Grn207	1
Black	1-apart	3	4	3|4	Grn207	1
Black	1-apart	3	4	3|4	Yel198	0
Black	1-apart	3	4	3|4	Yel198	0
Black	1-apart	3	4	3|4	Yel198	0
Black	1-apart	3	4	3|4	Yel198	0
Black	1-apart	3	4	3|4	Yel198	0
Black	1-apart	3	4	3|4	Yel198	0
Black	1-apart	3	4	3|4	Yel198	0
Black	1-apart	3	4	3|4	Yel198	1
Black	1-apart	3	4	3|4	Yel198	1
Black	1-apart	3	4	3|4	Yel198	1
Black	1-apart	3	4	3|4	Sil195	0
Black	1-apart	3	4	3|4	Sil195	0
Black	1-apart	3	4	3|4	Sil195	0
Black	1-apart	3	4	3|4	Sil195	0
Black	1-apart	3	4	3|4	Sil195	0
Black	1-apart	3	4	3|4	Sil195	0
Black	1-apart	3	4	3|4	Sil195	0
Black	1-apart	3	4	3|4	Sil195	1
Black	1-apart	3	4	3|4	Sil195	1
Black	1-apart	3	4	3|4	Sil195	1
Black	1-apart	3	4	3|4	Yel262	0
Black	1-apart	3	4	3|4	Yel262	0
Black	1-apart	3	4	3|4	Yel262	0
Black	1-apart	3	4	3|4	Yel262	0
Black	1-apart	3	4	3|4	Yel262	0
Black	1-apart	3	4	3|4	Yel262	0
Black	1-apart	3	4	3|4	Yel262	0
Black	1-apart	3	4	3|4	Yel262	0
Black	1-apart	3	4	3|4	Yel262	0
Black	1-apart	3	4	3|4	Yel262	1
Black	1-apart	3	4	3|4	Or189	0
Black	1-apart	3	4	3|4	Or189	0
Black	1-apart	3	4	3|4	Or189	0
Black	1-apart	3	4	3|4	Or189	0
Black	1-apart	3	4	3|4	Or189	0
Black	1-apart	3	4	3|4	Or189	0
Black	1-apart	3	4	3|4	Or189	0
Black	1-apart	3	4	3|4	Or189	0
Black	1-apart	3	4	3|4	Or189	1
Black	1-apart	3	4	3|4	Or189	1
Black	1-apart	3	4	3|4	Yel199	0
Black	1-apart	3	4	3|4	Yel199	0
Black	1-apart	3	4	3|4	Yel199	0
Black	1-apart	3	4	3|4	Yel199	0
Black	1-apart	3	4	3|4	Yel199	0
Black	1-apart	3	4	3|4	Yel199	0
Black	1-apart	3	4	3|4	Yel199	0
Black	1-apart	3	4	3|4	Yel199	0
Black	1-apart	3	4	3|4	Yel199	1
Black	1-apart	3	4	3|4	Yel199	1
Black	1-apart	4	5	4|5	Grn207	0
Black	1-apart	4	5	4|5	Grn207	1
Black	1-apart	4	5	4|5	Grn207	1
Black	1-apart	4	5	4|5	Grn207	1
Black	1-apart	4	5	4|5	Grn207	1
Black	1-apart	4	5	4|5	Grn207	1
Black	1-apart	4	5	4|5	Grn207	1
Black	1-apart	4	5	4|5	Grn207	1
Black	1-apart	4	5	4|5	Grn207	1
Black	1-apart	4	5	4|5	Grn207	1
Black	1-apart	4	5	4|5	Yel198	0
Black	1-apart	4	5	4|5	Yel198	0
Black	1-apart	4	5	4|5	Yel198	0
Black	1-apart	4	5	4|5	Yel198	0
Black	1-apart	4	5	4|5	Yel198	0
Black	1-apart	4	5	4|5	Yel198	0
Black	1-apart	4	5	4|5	Yel198	0
Black	1-apart	4	5	4|5	Yel198	1
Black	1-apart	4	5	4|5	Yel198	1
Black	1-apart	4	5	4|5	Yel198	1
Black	1-apart	4	5	4|5	Sil195	0
Black	1-apart	4	5	4|5	Sil195	0
Black	1-apart	4	5	4|5	Sil195	0
Black	1-apart	4	5	4|5	Sil195	0
Black	1-apart	4	5	4|5	Sil195	0
Black	1-apart	4	5	4|5	Sil195	1
Black	1-apart	4	5	4|5	Sil195	1
Black	1-apart	4	5	4|5	Sil195	1
Black	1-apart	4	5	4|5	Sil195	1
Black	1-apart	4	5	4|5	Sil195	1
Black	1-apart	4	5	4|5	Yel262	0
Black	1-apart	4	5	4|5	Yel262	0
Black	1-apart	4	5	4|5	Yel262	0
Black	1-apart	4	5	4|5	Yel262	0
Black	1-apart	4	5	4|5	Yel262	0
Black	1-apart	4	5	4|5	Yel262	0
Black	1-apart	4	5	4|5	Yel262	0
Black	1-apart	4	5	4|5	Yel262	1
Black	1-apart	4	5	4|5	Yel262	1
Black	1-apart	4	5	4|5	Yel262	1
Black	1-apart	4	5	4|5	Or189	0
Black	1-apart	4	5	4|5	Or189	0
Black	1-apart	4	5	4|5	Or189	0
Black	1-apart	4	5	4|5	Or189	0
Black	1-apart	4	5	4|5	Or189	0
Black	1-apart	4	5	4|5	Or189	1
Black	1-apart	4	5	4|5	Or189	1
Black	1-apart	4	5	4|5	Or189	1
Black	1-apart	4	5	4|5	Or189	1
Black	1-apart	4	5	4|5	Or189	1
Black	1-apart	4	5	4|5	Yel199	0
Black	1-apart	4	5	4|5	Yel199	0
Black	1-apart	4	5	4|5	Yel199	0
Black	1-apart	4	5	4|5	Yel199	0
Black	1-apart	4	5	4|5	Yel199	0
Black	1-apart	4	5	4|5	Yel199	1
Black	1-apart	4	5	4|5	Yel199	1
Black	1-apart	4	5	4|5	Yel199	1
Black	1-apart	4	5	4|5	Yel199	1
Black	1-apart	4	5	4|5	Yel199	1
Black	1-apart	5	6	5|6	Grn207	0
Black	1-apart	5	6	5|6	Grn207	0
Black	1-apart	5	6	5|6	Grn207	0
Black	1-apart	5	6	5|6	Grn207	0
Black	1-apart	5	6	5|6	Grn207	0
Black	1-apart	5	6	5|6	Grn207	0
Black	1-apart	5	6	5|6	Grn207	0
Black	1-apart	5	6	5|6	Grn207	1
Black	1-apart	5	6	5|6	Grn207	1
Black	1-apart	5	6	5|6	Grn207	1
Black	1-apart	5	6	5|6	Yel198	0
Black	1-apart	5	6	5|6	Yel198	0
Black	1-apart	5	6	5|6	Yel198	0
Black	1-apart	5	6	5|6	Yel198	0
Black	1-apart	5	6	5|6	Yel198	0
Black	1-apart	5	6	5|6	Yel198	0
Black	1-apart	5	6	5|6	Yel198	1
Black	1-apart	5	6	5|6	Yel198	1
Black	1-apart	5	6	5|6	Yel198	1
Black	1-apart	5	6	5|6	Yel198	1
Black	1-apart	5	6	5|6	Sil195	0
Black	1-apart	5	6	5|6	Sil195	0
Black	1-apart	5	6	5|6	Sil195	0
Black	1-apart	5	6	5|6	Sil195	0
Black	1-apart	5	6	5|6	Sil195	0
Black	1-apart	5	6	5|6	Sil195	0
Black	1-apart	5	6	5|6	Sil195	0
Black	1-apart	5	6	5|6	Sil195	1
Black	1-apart	5	6	5|6	Sil195	1
Black	1-apart	5	6	5|6	Sil195	1
Black	1-apart	5	6	5|6	Yel262	0
Black	1-apart	5	6	5|6	Yel262	0
Black	1-apart	5	6	5|6	Yel262	0
Black	1-apart	5	6	5|6	Yel262	1
Black	1-apart	5	6	5|6	Yel262	1
Black	1-apart	5	6	5|6	Yel262	1
Black	1-apart	5	6	5|6	Yel262	1
Black	1-apart	5	6	5|6	Yel262	1
Black	1-apart	5	6	5|6	Yel262	1
Black	1-apart	5	6	5|6	Yel262	1
Black	1-apart	5	6	5|6	Or189	0
Black	1-apart	5	6	5|6	Or189	0
Black	1-apart	5	6	5|6	Or189	0
Black	1-apart	5	6	5|6	Or189	0
Black	1-apart	5	6	5|6	Or189	0
Black	1-apart	5	6	5|6	Or189	0
Black	1-apart	5	6	5|6	Or189	0
Black	1-apart	5	6	5|6	Or189	1
Black	1-apart	5	6	5|6	Or189	1
Black	1-apart	5	6	5|6	Or189	1
Black	1-apart	5	6	5|6	Yel199	0
Black	1-apart	5	6	5|6	Yel199	0
Black	1-apart	5	6	5|6	Yel199	0
Black	1-apart	5	6	5|6	Yel199	0
Black	1-apart	5	6	5|6	Yel199	0
Black	1-apart	5	6	5|6	Yel199	1
Black	1-apart	5	6	5|6	Yel199	1
Black	1-apart	5	6	5|6	Yel199	1
Black	1-apart	5	6	5|6	Yel199	1
Black	1-apart	5	6	5|6	Yel199	1
Black	1-apart	6	7	6|7	Grn207	0
Black	1-apart	6	7	6|7	Grn207	0
Black	1-apart	6	7	6|7	Grn207	0
Black	1-apart	6	7	6|7	Grn207	0
Black	1-apart	6	7	6|7	Grn207	0
Black	1-apart	6	7	6|7	Grn207	0
Black	1-apart	6	7	6|7	Grn207	0
Black	1-apart	6	7	6|7	Grn207	0
Black	1-apart	6	7	6|7	Grn207	0
Black	1-apart	6	7	6|7	Grn207	0
Black	1-apart	6	7	6|7	Yel198	0
Black	1-apart	6	7	6|7	Yel198	0
Black	1-apart	6	7	6|7	Yel198	0
Black	1-apart	6	7	6|7	Yel198	0
Black	1-apart	6	7	6|7	Yel198	0
Black	1-apart	6	7	6|7	Yel198	0
Black	1-apart	6	7	6|7	Yel198	0
Black	1-apart	6	7	6|7	Yel198	0
Black	1-apart	6	7	6|7	Yel198	1
Black	1-apart	6	7	6|7	Yel198	1
Black	1-apart	6	7	6|7	Sil195	0
Black	1-apart	6	7	6|7	Sil195	0
Black	1-apart	6	7	6|7	Sil195	0
Black	1-apart	6	7	6|7	Sil195	0
Black	1-apart	6	7	6|7	Sil195	0
Black	1-apart	6	7	6|7	Sil195	0
Black	1-apart	6	7	6|7	Sil195	0
Black	1-apart	6	7	6|7	Sil195	0
Black	1-apart	6	7	6|7	Sil195	0
Black	1-apart	6	7	6|7	Sil195	0
Black	1-apart	6	7	6|7	Yel262	0
Black	1-apart	6	7	6|7	Yel262	0
Black	1-apart	6	7	6|7	Yel262	0
Black	1-apart	6	7	6|7	Yel262	0
Black	1-apart	6	7	6|7	Yel262	0
Black	1-apart	6	7	6|7	Yel262	0
Black	1-apart	6	7	6|7	Yel262	0
Black	1-apart	6	7	6|7	Yel262	0
Black	1-apart	6	7	6|7	Yel262	1
Black	1-apart	6	7	6|7	Yel262	1
Black	1-apart	6	7	6|7	Or189	0
Black	1-apart	6	7	6|7	Or189	0
Black	1-apart	6	7	6|7	Or189	0
Black	1-apart	6	7	6|7	Or189	0
Black	1-apart	6	7	6|7	Or189	0
Black	1-apart	6	7	6|7	Or189	0
Black	1-apart	6	7	6|7	Or189	0
Black	1-apart	6	7	6|7	Or189	0
Black	1-apart	6	7	6|7	Or189	1
Black	1-apart	6	7	6|7	Or189	1
Black	1-apart	6	7	6|7	Yel199	0
Black	1-apart	6	7	6|7	Yel199	0
Black	1-apart	6	7	6|7	Yel199	0
Black	1-apart	6	7	6|7	Yel199	0
Black	1-apart	6	7	6|7	Yel199	0
Black	1-apart	6	7	6|7	Yel199	0
Black	1-apart	6	7	6|7	Yel199	0
Black	1-apart	6	7	6|7	Yel199	1
Black	1-apart	6	7	6|7	Yel199	1
Black	1-apart	6	7	6|7	Yel199	1
Black	1-apart	7	8	7|8	Grn207	0
Black	1-apart	7	8	7|8	Grn207	0
Black	1-apart	7	8	7|8	Grn207	0
Black	1-apart	7	8	7|8	Grn207	0
Black	1-apart	7	8	7|8	Grn207	1
Black	1-apart	7	8	7|8	Grn207	1
Black	1-apart	7	8	7|8	Grn207	1
Black	1-apart	7	8	7|8	Grn207	1
Black	1-apart	7	8	7|8	Grn207	1
Black	1-apart	7	8	7|8	Grn207	1
Black	1-apart	7	8	7|8	Yel198	0
Black	1-apart	7	8	7|8	Yel198	0
Black	1-apart	7	8	7|8	Yel198	0
Black	1-apart	7	8	7|8	Yel198	0
Black	1-apart	7	8	7|8	Yel198	0
Black	1-apart	7	8	7|8	Yel198	0
Black	1-apart	7	8	7|8	Yel198	0
Black	1-apart	7	8	7|8	Yel198	1
Black	1-apart	7	8	7|8	Yel198	1
Black	1-apart	7	8	7|8	Yel198	1
Black	1-apart	7	8	7|8	Sil195	0
Black	1-apart	7	8	7|8	Sil195	0
Black	1-apart	7	8	7|8	Sil195	0
Black	1-apart	7	8	7|8	Sil195	0
Black	1-apart	7	8	7|8	Sil195	0
Black	1-apart	7	8	7|8	Sil195	0
Black	1-apart	7	8	7|8	Sil195	0
Black	1-apart	7	8	7|8	Sil195	1
Black	1-apart	7	8	7|8	Sil195	1
Black	1-apart	7	8	7|8	Sil195	1
Black	1-apart	7	8	7|8	Yel262	0
Black	1-apart	7	8	7|8	Yel262	0
Black	1-apart	7	8	7|8	Yel262	0
Black	1-apart	7	8	7|8	Yel262	1
Black	1-apart	7	8	7|8	Yel262	1
Black	1-apart	7	8	7|8	Yel262	1
Black	1-apart	7	8	7|8	Yel262	1
Black	1-apart	7	8	7|8	Yel262	1
Black	1-apart	7	8	7|8	Yel262	1
Black	1-apart	7	8	7|8	Yel262	1
Black	1-apart	7	8	7|8	Or189	0
Black	1-apart	7	8	7|8	Or189	0
Black	1-apart	7	8	7|8	Or189	0
Black	1-apart	7	8	7|8	Or189	0
Black	1-apart	7	8	7|8	Or189	0
Black	1-apart	7	8	7|8	Or189	0
Black	1-apart	7	8	7|8	Or189	1
Black	1-apart	7	8	7|8	Or189	1
Black	1-apart	7	8	7|8	Or189	1
Black	1-apart	7	8	7|8	Or189	1
Black	1-apart	7	8	7|8	Yel199	0
Black	1-apart	7	8	7|8	Yel199	0
Black	1-apart	7	8	7|8	Yel199	0
Black	1-apart	7	8	7|8	Yel199	0
Black	1-apart	7	8	7|8	Yel199	0
Black	1-apart	7	8	7|8	Yel199	0
Black	1-apart	7	8	7|8	Yel199	0
Black	1-apart	7	8	7|8	Yel199	0
Black	1-apart	7	8	7|8	Yel199	0
Black	1-apart	7	8	7|8	Yel199	0
White	5-apart	3	8	3|8	Grn207	1
White	5-apart	3	8	3|8	Grn207	1
White	5-apart	3	8	3|8	Grn207	1
White	5-apart	3	8	3|8	Grn207	1
White	5-apart	3	8	3|8	Grn207	1
White	5-apart	3	8	3|8	Grn207	1
White	5-apart	3	8	3|8	Grn207	1
White	5-apart	3	8	3|8	Grn207	1
White	5-apart	3	8	3|8	Grn207	1
White	5-apart	3	8	3|8	Grn207	1
White	5-apart	3	8	3|8	Yel198	1
White	5-apart	3	8	3|8	Yel198	1
White	5-apart	3	8	3|8	Yel198	1
White	5-apart	3	8	3|8	Yel198	1
White	5-apart	3	8	3|8	Yel198	1
White	5-apart	3	8	3|8	Yel198	1
White	5-apart	3	8	3|8	Yel198	1
White	5-apart	3	8	3|8	Yel198	1
White	5-apart	3	8	3|8	Yel198	1
White	5-apart	3	8	3|8	Yel198	1
White	5-apart	3	8	3|8	Sil195	1
White	5-apart	3	8	3|8	Sil195	1
White	5-apart	3	8	3|8	Sil195	1
White	5-apart	3	8	3|8	Sil195	1
White	5-apart	3	8	3|8	Sil195	1
White	5-apart	3	8	3|8	Sil195	1
White	5-apart	3	8	3|8	Sil195	1
White	5-apart	3	8	3|8	Sil195	1
White	5-apart	3	8	3|8	Sil195	1
White	5-apart	3	8	3|8	Sil195	1
White	5-apart	3	8	3|8	Yel262	0
White	5-apart	3	8	3|8	Yel262	0
White	5-apart	3	8	3|8	Yel262	0
White	5-apart	3	8	3|8	Yel262	1
White	5-apart	3	8	3|8	Yel262	1
White	5-apart	3	8	3|8	Yel262	1
White	5-apart	3	8	3|8	Yel262	1
White	5-apart	3	8	3|8	Yel262	1
White	5-apart	3	8	3|8	Yel262	1
White	5-apart	3	8	3|8	Yel262	1
White	5-apart	3	8	3|8	Or189	1
White	5-apart	3	8	3|8	Or189	1
White	5-apart	3	8	3|8	Or189	1
White	5-apart	3	8	3|8	Or189	1
White	5-apart	3	8	3|8	Or189	1
White	5-apart	3	8	3|8	Or189	1
White	5-apart	3	8	3|8	Or189	1
White	5-apart	3	8	3|8	Or189	1
White	5-apart	3	8	3|8	Or189	1
White	5-apart	3	8	3|8	Or189	1
White	5-apart	3	8	3|8	Yel199	0
White	5-apart	3	8	3|8	Yel199	0
White	5-apart	3	8	3|8	Yel199	0
White	5-apart	3	8	3|8	Yel199	1
White	5-apart	3	8	3|8	Yel199	1
White	5-apart	3	8	3|8	Yel199	1
White	5-apart	3	8	3|8	Yel199	1
White	5-apart	3	8	3|8	Yel199	1
White	5-apart	3	8	3|8	Yel199	1
White	5-apart	3	8	3|8	Yel199	1
White	4-apart	3	7	3|7	Grn207	1
White	4-apart	3	7	3|7	Grn207	1
White	4-apart	3	7	3|7	Grn207	1
White	4-apart	3	7	3|7	Grn207	1
White	4-apart	3	7	3|7	Grn207	1
White	4-apart	3	7	3|7	Grn207	1
White	4-apart	3	7	3|7	Grn207	1
White	4-apart	3	7	3|7	Grn207	1
White	4-apart	3	7	3|7	Grn207	1
White	4-apart	3	7	3|7	Grn207	1
White	4-apart	3	7	3|7	Yel198	0
White	4-apart	3	7	3|7	Yel198	1
White	4-apart	3	7	3|7	Yel198	1
White	4-apart	3	7	3|7	Yel198	1
White	4-apart	3	7	3|7	Yel198	1
White	4-apart	3	7	3|7	Yel198	1
White	4-apart	3	7	3|7	Yel198	1
White	4-apart	3	7	3|7	Yel198	1
White	4-apart	3	7	3|7	Yel198	1
White	4-apart	3	7	3|7	Yel198	1
White	4-apart	3	7	3|7	Sil195	0
White	4-apart	3	7	3|7	Sil195	1
White	4-apart	3	7	3|7	Sil195	1
White	4-apart	3	7	3|7	Sil195	1
White	4-apart	3	7	3|7	Sil195	1
White	4-apart	3	7	3|7	Sil195	1
White	4-apart	3	7	3|7	Sil195	1
White	4-apart	3	7	3|7	Sil195	1
White	4-apart	3	7	3|7	Sil195	1
White	4-apart	3	7	3|7	Sil195	1
White	4-apart	3	7	3|7	Yel262	0
White	4-apart	3	7	3|7	Yel262	1
White	4-apart	3	7	3|7	Yel262	1
White	4-apart	3	7	3|7	Yel262	1
White	4-apart	3	7	3|7	Yel262	1
White	4-apart	3	7	3|7	Yel262	1
White	4-apart	3	7	3|7	Yel262	1
White	4-apart	3	7	3|7	Yel262	1
White	4-apart	3	7	3|7	Yel262	1
White	4-apart	3	7	3|7	Yel262	1
White	4-apart	3	7	3|7	Or189	1
White	4-apart	3	7	3|7	Or189	1
White	4-apart	3	7	3|7	Or189	1
White	4-apart	3	7	3|7	Or189	1
White	4-apart	3	7	3|7	Or189	1
White	4-apart	3	7	3|7	Or189	1
White	4-apart	3	7	3|7	Or189	1
White	4-apart	3	7	3|7	Or189	1
White	4-apart	3	7	3|7	Or189	1
White	4-apart	3	7	3|7	Or189	1
White	4-apart	3	7	3|7	Yel199	0
White	4-apart	3	7	3|7	Yel199	0
White	4-apart	3	7	3|7	Yel199	0
White	4-apart	3	7	3|7	Yel199	1
White	4-apart	3	7	3|7	Yel199	1
White	4-apart	3	7	3|7	Yel199	1
White	4-apart	3	7	3|7	Yel199	1
White	4-apart	3	7	3|7	Yel199	1
White	4-apart	3	7	3|7	Yel199	1
White	4-apart	3	7	3|7	Yel199	1
White	4-apart	4	8	4|8	Grn207	1
White	4-apart	4	8	4|8	Grn207	1
White	4-apart	4	8	4|8	Grn207	1
White	4-apart	4	8	4|8	Grn207	1
White	4-apart	4	8	4|8	Grn207	1
White	4-apart	4	8	4|8	Grn207	1
White	4-apart	4	8	4|8	Grn207	1
White	4-apart	4	8	4|8	Grn207	1
White	4-apart	4	8	4|8	Grn207	1
White	4-apart	4	8	4|8	Grn207	1
White	4-apart	4	8	4|8	Yel198	1
White	4-apart	4	8	4|8	Yel198	1
White	4-apart	4	8	4|8	Yel198	1
White	4-apart	4	8	4|8	Yel198	1
White	4-apart	4	8	4|8	Yel198	1
White	4-apart	4	8	4|8	Yel198	1
White	4-apart	4	8	4|8	Yel198	1
White	4-apart	4	8	4|8	Yel198	1
White	4-apart	4	8	4|8	Yel198	1
White	4-apart	4	8	4|8	Yel198	1
White	4-apart	4	8	4|8	Sil195	1
White	4-apart	4	8	4|8	Sil195	1
White	4-apart	4	8	4|8	Sil195	1
White	4-apart	4	8	4|8	Sil195	1
White	4-apart	4	8	4|8	Sil195	1
White	4-apart	4	8	4|8	Sil195	1
White	4-apart	4	8	4|8	Sil195	1
White	4-apart	4	8	4|8	Sil195	1
White	4-apart	4	8	4|8	Sil195	1
White	4-apart	4	8	4|8	Sil195	1
White	4-apart	4	8	4|8	Yel262	0
White	4-apart	4	8	4|8	Yel262	1
White	4-apart	4	8	4|8	Yel262	1
White	4-apart	4	8	4|8	Yel262	1
White	4-apart	4	8	4|8	Yel262	1
White	4-apart	4	8	4|8	Yel262	1
White	4-apart	4	8	4|8	Yel262	1
White	4-apart	4	8	4|8	Yel262	1
White	4-apart	4	8	4|8	Yel262	1
White	4-apart	4	8	4|8	Yel262	1
White	4-apart	4	8	4|8	Or189	1
White	4-apart	4	8	4|8	Or189	1
White	4-apart	4	8	4|8	Or189	1
White	4-apart	4	8	4|8	Or189	1
White	4-apart	4	8	4|8	Or189	1
White	4-apart	4	8	4|8	Or189	1
White	4-apart	4	8	4|8	Or189	1
White	4-apart	4	8	4|8	Or189	1
White	4-apart	4	8	4|8	Or189	1
White	4-apart	4	8	4|8	Or189	1
White	4-apart	4	8	4|8	Yel199	0
White	4-apart	4	8	4|8	Yel199	0
White	4-apart	4	8	4|8	Yel199	0
White	4-apart	4	8	4|8	Yel199	0
White	4-apart	4	8	4|8	Yel199	1
White	4-apart	4	8	4|8	Yel199	1
White	4-apart	4	8	4|8	Yel199	1
White	4-apart	4	8	4|8	Yel199	1
White	4-apart	4	8	4|8	Yel199	1
White	4-apart	4	8	4|8	Yel199	1
White	3-apart	3	6	3|6	Grn207	1
White	3-apart	3	6	3|6	Grn207	1
White	3-apart	3	6	3|6	Grn207	1
White	3-apart	3	6	3|6	Grn207	1
White	3-apart	3	6	3|6	Grn207	1
White	3-apart	3	6	3|6	Grn207	1
White	3-apart	3	6	3|6	Grn207	1
White	3-apart	3	6	3|6	Grn207	1
White	3-apart	3	6	3|6	Grn207	1
White	3-apart	3	6	3|6	Grn207	1
White	3-apart	3	6	3|6	Yel198	0
White	3-apart	3	6	3|6	Yel198	1
White	3-apart	3	6	3|6	Yel198	1
White	3-apart	3	6	3|6	Yel198	1
White	3-apart	3	6	3|6	Yel198	1
White	3-apart	3	6	3|6	Yel198	1
White	3-apart	3	6	3|6	Yel198	1
White	3-apart	3	6	3|6	Yel198	1
White	3-apart	3	6	3|6	Yel198	1
[truncated: 2,501 more rows]
